# Supplementary material for: Quantification of the composition of pyrolysis oils of complex plastic waste by gas chromatography coupled with mass spectrometer detector
Source: Royal Society of Chemistry journal article supplement (doi:10.1039/d4ra00226a), 2024-01-01
Supplement: d4ra00226a1.pdf [file d4ra00226a1.pdf]

**Supplementary Information**

**QUANTIFICATION OF THE COMPOSITION OF PYROLYSIS OILS OF COMPLEX PLASTIC  
WASTE BY GAS CHROMATOGRAPHY COUPLED WITH MASS SPECTROMETER  
DETECTOR**

A. Serras-Malillos, B.B. Perez-Martinez, A. Iriondo, E. Acha\*, A. Lopez-Urionabarrenechea, B. M. Caballero.

\*email of corresponding author: [esther.acha@ehu.eus](mailto:esther.acha@ehu.eus)

*Chemical and Environmental Engineering Department, Faculty of Engineering of Bilbao, University of the Basque Country (UPV/EHU). Plaza Ingeniero Torres Quevedo, 1, 48013-Bilbao, Spain.*

**Keywords:** Gas chromatography, pyrolysis oils, plastic waste, quantification method, mass spectrometry, Kováts Retention Index.

Table S1. Pyrolysis oils' naming (ID), waste and pyrolysis experiment description.

| ID#                                                                                                                                       | Waste description |             | Materials                                               | Experiment conditions  |
|-------------------------------------------------------------------------------------------------------------------------------------------|-------------------|-------------|---------------------------------------------------------|------------------------|
| <i>Note that the three pyrolysis liquids used as use-case in the manuscript documents correspond to these three pyrolysis liquids ID:</i> |                   |             |                                                         |                        |
| <i>ID1 = "FRP" and "FRP (x10)"</i>                                                                                                        |                   |             |                                                         |                        |
| <i>ID11 = "WEEE" and "WEEE (1/10)"</i>                                                                                                    |                   |             |                                                         |                        |
| <i>ID12 = "PACKAGING"</i>                                                                                                                 |                   |             |                                                         |                        |
| ID1                                                                                                                                       | EoL<br>FRP        | Boat-hull   | Glass fibre, polyester resin, wood, painting            | Conventional pyrolysis |
| ID2                                                                                                                                       |                   | Car chassis | Carbon fibre, epoxy resin, adhesive, painting, stickers |                        |
| ID3                                                                                                                                       |                   | Surfboard   | Glass fibre, polyester resin, polyurethane foam, wood,  |                        |

|      |                                 |                                                                                 |                                                 |
|------|---------------------------------|---------------------------------------------------------------------------------|-------------------------------------------------|
|      |                                 | paraffin wax                                                                    |                                                 |
| ID4  |                                 | Rowing boat reinforcement                                                       | Carbon and glass fibre, epoxy resin, painting   |
| ID5  |                                 | Racing car headlight support                                                    | Glass fibre, polyester resin, painting, gelcoat |
| ID6  |                                 | Coastguard boat-hull                                                            | Glass fibre, polyester resin, painting          |
| ID7  | Discarded polymer mix from WEEE | Polyolefin, styrenic plastics, PVC, rubbers, other plastics, inorganic material | Conventional pyrolysis                          |
| ID8  |                                 |                                                                                 | Stepwise pyrolysis                              |
| ID9  |                                 |                                                                                 | Conventional pyrolysis + adsorption (type 1)    |
| ID10 |                                 |                                                                                 | Conventional pyrolysis + adsorption (type 2)    |
| ID11 |                                 |                                                                                 | Stepwise pyrolysis + adsorption (type 3)        |
| ID12 | Plastic from packaging          | Polyolefins (mainly) + polystyrene                                              | Conventional pyrolysis                          |

Table S2. Certified mixture of saturated C7 – C30 alkanes, 1,000 µg/mL of each component in hexane (alkane-mix).

|   | Saturated alkanes | Formula                         | CAS number |
|---|-------------------|---------------------------------|------------|
| 1 | Heptane           | C <sub>7</sub> H <sub>16</sub>  | 142-82-5   |
| 2 | Octane            | C <sub>8</sub> H <sub>18</sub>  | 111-65-9   |
| 3 | Nonane            | C <sub>9</sub> H <sub>20</sub>  | 111-84-2   |
| 4 | Decane            | C <sub>10</sub> H <sub>22</sub> | 124-18-5   |
| 5 | Undecane          | C <sub>11</sub> H <sub>24</sub> | 1120-21-4  |
| 6 | Dodecane          | C <sub>12</sub> H <sub>26</sub> | 112-40-3   |
| 7 | Tridecane         | C <sub>13</sub> H <sub>28</sub> | 629-50-5   |
| 8 | Tetradecane       | C <sub>14</sub> H <sub>30</sub> | 629-59-4   |

|    |             |                                 |          |
|----|-------------|---------------------------------|----------|
| 9  | Pentadecane | C <sub>15</sub> H <sub>32</sub> | 629-62-9 |
| 10 | Hexadecane  | C <sub>16</sub> H <sub>34</sub> | 544-76-3 |
| 11 | Heptadecane | C <sub>17</sub> H <sub>36</sub> | 629-78-7 |
| 12 | Octadecane  | C <sub>18</sub> H <sub>38</sub> | 593-45-3 |
| 13 | Nonadecane  | C <sub>19</sub> H <sub>40</sub> | 629-92-5 |
| 14 | Eicosane    | C <sub>20</sub> H <sub>42</sub> | 112-95-8 |
| 15 | Heneicosane | C <sub>21</sub> H <sub>44</sub> | 629-94-7 |
| 16 | Docosane    | C <sub>22</sub> H <sub>46</sub> | 629-97-0 |
| 17 | Tricosane   | C <sub>23</sub> H <sub>48</sub> | 638-67-5 |
| 18 | Tetracosane | C <sub>24</sub> H <sub>50</sub> | 646-31-1 |
| 19 | Pentacosane | C <sub>25</sub> H <sub>52</sub> | 629-99-2 |
| 20 | Hexacosane  | C <sub>26</sub> H <sub>54</sub> | 630-01-3 |
| 21 | Heptacosane | C <sub>27</sub> H <sub>56</sub> | 593-49-7 |
| 22 | Octacosane  | C <sub>28</sub> H <sub>58</sub> | 630-02-4 |
| 23 | Nonacosane  | C <sub>29</sub> H <sub>60</sub> | 630-03-5 |
| 24 | triacontane | C <sub>30</sub> H <sub>62</sub> | 638-68-6 |

Table S3. C7-C30 alkane mix analysis by the chromatographic method used during this work (split ratio 1:15) and by the same method in a splitless injection.

|           |                 | <b>Split 1:15</b>             | <b>Splitless</b>              |
|-----------|-----------------|-------------------------------|-------------------------------|
| <b>RT</b> | <b>Compound</b> | <b>Normalized peak area %</b> | <b>Normalized peak area %</b> |
| 3.796     | heptane         | 2,8                           | 3,0                           |
| 4.284     | octane          | 2,7                           | 2,9                           |
| 12.447    | undecane        | 2,9                           | 3,1                           |
| 14.150    | dodecane        | 2,9                           | 3,0                           |
| 15.773    | tridecane       | 3,8                           | 3,9                           |
| 17.367    | tetradecane     | 3,7                           | 3,6                           |
| 18.773    | pentadecane     | 3,9                           | 3,8                           |
| 20.258    | hexadecane      | 4,0                           | 4,0                           |
| 21.932    | heptadecane     | 3,8                           | 3,7                           |
| 24.058    | octadecane      | 3,5                           | 3,6                           |
| 26.185    | nonadecane      | 3,9                           | 3,9                           |

|        |             |     |     |
|--------|-------------|-----|-----|
| 28.109 | eicosane    | 4,2 | 4,1 |
| 29.808 | heneicosane | 4,5 | 4,6 |
| 31.350 | docosane    | 4,9 | 4,9 |
| 32.776 | tricosane   | 5,0 | 5,0 |
| 34.137 | tetracosane | 5,5 | 5,7 |
| 35.252 | pentacosane | 6,0 | 6,1 |
| 36.362 | hexacosane  | 6,0 | 6,1 |
| 37.587 | heptacosane | 6,3 | 6,0 |
| 39.022 | octacosane  | 6,6 | 6,6 |
| 40.723 | nonacosane  | 6,2 | 6,4 |
| 42.826 | triacontane | 6,9 | 5,9 |

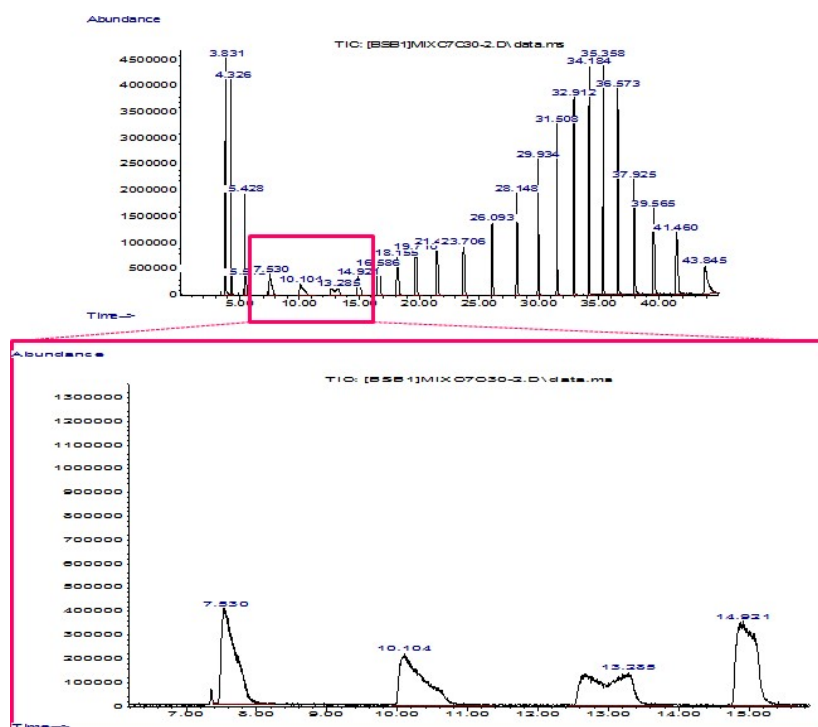

Figure S1. Poor solubility of the compounds with low retention times in the n-alkane mix dissolved in THF (7 min to 15 min).

Table S4. Quantification (in (µg/mL)) of the calibrated five aromatic and twelve aliphatic validation compounds for the thirteen studied pyrolysis oils: (a) prepared concentration (b) calculated concentration obtained with the proposed quantification methodology (using correction factor), (c) calculated concentration obtained with the proposed quantification methodology (without using correction factor), (d) concentration based on the hypothesis that area% is equal to weight%. “n.d.” corresponds to those compounds which are “not detected” in the GC-MS.

| ID# | Validation compounds   | (a)                        | (b)                          |                          |                      | (b)                                    |                          |                      | (d)                            |                          |                      |
|-----|------------------------|----------------------------|------------------------------|--------------------------|----------------------|----------------------------------------|--------------------------|----------------------|--------------------------------|--------------------------|----------------------|
|     |                        | [ ]<br>prepared<br>(µg/mL) | [ ]<br>calculated<br>(µg/mL) | Abs.<br>error<br>(µg/mL) | Rel.<br>error<br>(%) | [ ]<br>calculated<br>w/o CF<br>(µg/mL) | Abs.<br>error<br>(µg/mL) | Rel.<br>error<br>(%) | [ ] <sub>area</sub><br>(µg/mL) | Abs.<br>error<br>(µg/mL) | Rel.<br>error<br>(%) |
| ID1 | Toluene                | 68                         | 97                           | +29                      | +43                  | 118                                    | +50                      | +43                  | 280                            | +212                     | +312                 |
|     | Ethylbenzene           | 204                        | 294                          | +91                      | +45                  | 358                                    | +154                     | +43                  | 846                            | +643                     | +316                 |
|     | Styrene                | 401                        | 650                          | +249                     | +62                  | 539                                    | +138                     | +26                  | 1,956                          | +1,555                   | +388                 |
|     | Phenol                 | n.d.                       | n.d.                         | n.d.                     | n.d.                 | n.d.                                   | n.d.                     | n.d.                 | n.d.                           | n.d.                     | n.d.                 |
|     | Benzenebutanenitrile   | n.d.                       | n.d.                         | n.d.                     | n.d.                 | n.d.                                   | n.d.                     | n.d.                 | n.d.                           | n.d.                     | n.d.                 |
|     | ∑ validation compounds | 673                        | 1,042                        | +369                     | +55                  | 1,015                                  | +342                     | +51                  | 3,082                          | +2,410                   | +358                 |
| ID2 | Toluene                | 23                         | 32                           | +10                      | +43                  | 39                                     | +17                      | +74                  | 61                             | +38                      | +168                 |

|            |                       |       |       |      |      |       |      |      |       |        |      |
|------------|-----------------------|-------|-------|------|------|-------|------|------|-------|--------|------|
|            | Ethylbenzene          | n.d.  | n.d.  | n.d. | n.d. | n.d.  | n.d. | n.d. | n.d.  | n.d.   | n.d. |
|            | Styrene               | 90    | 146   | +56  | +62  | 122   | +31  | +34  | 287   | +197   | +218 |
|            | Phenol                | 1,675 | 1,325 | -349 | -21  | 1181  | -493 | -29  | 3,297 | +1,622 | +97  |
|            | Benzenebutanenitrile  | n.d.  | n.d.  | n.d. | n.d. | n.d.  | n.d. | n.d. | n.d.  | n.d.   | n.d. |
|            | ∑validation compounds | 1,788 | 1,504 | -284 | -16  | 1,342 | -446 | -25  | 3,645 | +1,857 | +104 |
| <b>ID3</b> | Toluene               | 14    | 160   | +48  | +43  | 195   | +83  | +74  | 567   | +455   | +407 |
|            | Ethylbenzene          | 210   | 304   | +94  | +45  | 370   | +159 | +76  | 1,077 | +867   | +412 |
|            | Styrene               | 454   | 736   | +281 | +62  | 610   | +156 | +34  | 2,727 | +2,273 | +500 |
|            | Phenol                | 111   | 88    | -23  | -21  | 78    | -33  | -29  | 412   | +301   | +272 |
|            | Benzenebutanenitrile  | n.d.  | n.d.  | n.d. | n.d. | n.d.  | n.d. | n.d. | n.d.  | n.d.   | n.d. |
|            | ∑validation compounds | 887   | 1288  | +400 | +45  | 1,253 | -769 | -87  | 4,783 | +3,896 | +439 |
| <b>ID4</b> | Toluene               | 3     | 4     | +1   | +43  | 5     | +2   | +74  | 7     | +5     | +166 |
|            | Ethylbenzene          | n.d.  | n.d.  | n.d. | n.d. | n.d.  | n.d. | n.d. | n.d.  | n.d.   | n.d. |
|            | Styrene               | n.d.  | n.d.  | n.d. | n.d. | n.d.  | n.d. | n.d. | n.d.  | n.d.   | n.d. |
|            | Phenol                | 1,769 | 1,400 | -369 | -21  | 1248  | -521 | -29  | 3,459 | +1,689 | +95  |

|            |                       |       |       |        |      |       |      |      |        |        |      |
|------------|-----------------------|-------|-------|--------|------|-------|------|------|--------|--------|------|
|            | Benzenebutanenitrile  | n.d.  | n.d.  | n.d.   | n.d. | n.d.  | n.d. | n.d. | n.d.   | n.d.   | n.d. |
|            | ∑validation compounds | 1,772 | 1,404 | -368   | -21  | 1,253 | -519 | -29  | 3,466  | +1,694 | +96  |
| <b>ID5</b> | Toluene               | 139   | 199   | +60    | +43  | 242   | +103 | +74  | 347    | +207   | +149 |
|            | Ethylbenzene          | 427   | 617   | +190   | +45  | 750   | +323 | +76  | 1,073  | +646   | +152 |
|            | Styrene               | 914   | 1,481 | +566   | +62  | 1228  | +314 | +34  | 2,696  | +1,782 | +195 |
|            | Phenol                | 72    | 57    | -15    | -21  | 51    | -21  | -29  | 132    | +60    | +83  |
|            | Benzenebutanenitrile  | n.d.  | n.d.  | n.d.   | n.d. | n.d.  | n.d. | n.d. | n.d.   | n.d.   | n.d. |
|            | ∑validation compounds | 1,552 | 2,354 | +802   | +52  | 2,271 | +719 | +46  | 4,248  | +2,696 | +174 |
| <b>ID6</b> | Toluene               | 154   | 221   | +67    | +43  | 268   | +114 | +74  | 372    | +218   | +141 |
|            | Ethylbenzene          | 387   | 560   | +173   | +45  | 681   | +294 | +76  | 945    | +557   | +144 |
|            | Styrene               | 1,368 | 2,216 | +848   | +62  | 1838  | +470 | +34  | 3,911  | +2,542 | +186 |
|            | Phenol                | n.d.  | n.d.  | n.d.   | n.d. | n.d.  | n.d. | n.d. | n.d.   | n.d.   | n.d. |
|            | Benzenebutanenitrile  | n.d.  | n.d.  | n.d.   | n.d. | n.d.  | n.d. | n.d. | n.d.   | n.d.   | n.d. |
|            | ∑validation compounds | 3,820 | 5,995 | +2,174 | +57  | 2,788 | +878 | +46  | 10,455 | +6,635 | +174 |

|            |                       |       |       |        |     |       |        |     |       |        |      |
|------------|-----------------------|-------|-------|--------|-----|-------|--------|-----|-------|--------|------|
| <b>ID7</b> | Toluene               | 418   | 598   | +180   | +43 | 727   | +309   | +74 | 1,012 | +594   | +142 |
|            | Ethylbenzene          | 477   | 690   | +213   | +45 | 839   | +362   | +76 | 1,168 | +691   | +145 |
|            | Styrene               | 1,533 | 2,482 | +949   | +62 | 2,059 | +526   | +34 | 4,397 | +2,865 | +187 |
|            | Phenol                | 665   | 526   | -139   | -21 | 469   | -196   | -29 | 1,183 | +518   | +78  |
|            | Benzenebutanenitrile  | 119   | 55    | -64    | -54 | 94    | -25    | -21 | 326   | +207   | +174 |
|            | ∑validation compounds | 3,212 | 4,352 | +1,140 | +35 | 4,188 | +976   | +30 | 8,086 | +4,874 | +152 |
| <b>ID8</b> | Toluene               | 443   | 634   | +191   | +43 | 771   | +328   | +74 | 953   | +510   | +115 |
|            | Ethylbenzene          | 687   | 993   | +307   | +45 | 1,207 | +521   | +76 | 1,493 | +806   | +117 |
|            | Styrene               | 1,474 | 2,386 | +913   | +62 | 1,980 | +506   | +34 | 3,755 | +2,281 | +155 |
|            | Phenol                | 443   | 350   | -92    | -21 | 312   | -130   | -29 | 700   | +257   | +58  |
|            | Benzenebutanenitrile  | 132   | 61    | -70    | -54 | 104   | -28    | -21 | 320   | +188   | +143 |
|            | ∑validation compounds | 3,178 | 4,425 | 1,248  | 39  | 4,374 | +1,196 | +38 | 7,220 | +4,042 | +127 |
| <b>ID9</b> | Toluene               | 472   | 676   | +204   | +43 | 822   | +349   | +74 | 357   | -115   | -24  |
|            | Ethylbenzene          | 716   | 989   | +273   | +38 | 1,202 | +486   | +68 | 547   | -169   | -24  |
|            | Styrene               | 2,132 | 3,452 | +1,320 | +62 | 2,864 | +732   | +34 | 1,908 | -224   | -10  |



|             |                       |       |       |        |     |       |        |     |       |        |      |
|-------------|-----------------------|-------|-------|--------|-----|-------|--------|-----|-------|--------|------|
|             | Phenol                | 826   | 654   | -172   | -21 | 583   | -243   | -29 | 458   | -368   | -45  |
|             | Benzenebutanenitrile  | 56    | 26    | -30    | -54 | 44    | -12    | -21 | 48    | -8     | -15  |
|             | ∑validation compounds | 4,202 | 5,797 | 1,595  | 38  | 5,514 | +1,312 | +31 | 3,318 | -884   | -21  |
| <b>ID10</b> | Toluene               | 410   | 586   | +177   | +43 | 713   | +303   | +74 | 779   | +369   | +90  |
|             | Ethylbenzene          | 611   | 884   | +273   | +45 | 1,075 | +463   | +76 | 1,174 | +563   | +92  |
|             | Styrene               | 1,942 | 3,145 | +1,203 | +62 | 2,609 | +667   | +34 | 4,373 | +2,431 | +125 |
|             | Phenol                | 914   | 724   | -191   | -21 | 645   | -269   | -29 | 1,276 | +362   | +40  |
|             | Benzenebutanenitrile  | 157   | 73    | -84    | -54 | 124   | -33    | -21 | 338   | +181   | +115 |
|             | ∑validation compounds | 4,034 | 5,412 | +1,377 | +34 | 5,165 | +1,130 | +28 | 7,940 | +3,906 | +97  |
| <b>ID11</b> | Toluene               | 670   | 958   | +289   | +43 | 1,165 | +495   | +74 | 922   | +253   | +38  |
|             | Ethylbenzene          | 1,181 | 1,708 | +527   | +45 | 2,075 | +895   | +76 | 1,643 | +462   | +39  |
|             | Styrene               | 2,608 | 4,223 | +1,615 | +62 | 3,503 | +895   | +34 | 4,255 | +1,647 | +63  |
|             | Phenol                | 813   | 643   | -170   | -21 | 573   | -239   | -29 | 822   | +9     | +1   |
|             | Benzenebutanenitrile  | 74    | 35    | -40    | -54 | 59    | -16    | -21 | 116   | +41    | +56  |
|             | ∑validation           | 5,345 | 7,567 | +2,222 | +42 | 7,376 | +2,030 | +38 | 7,757 | +2,412 | +45  |

|             |                                   |       |       |        |      |       |        |      |        |        |      |
|-------------|-----------------------------------|-------|-------|--------|------|-------|--------|------|--------|--------|------|
|             | compounds                         |       |       |        |      |       |        |      |        |        |      |
| <b>ID12</b> | Toluene                           | 201   | 288   | +87    | +43  | 350   | +149   | +74  | 683    | +395   | +197 |
|             | Ethylbenzene                      | 293   | 423   | +131   | +45  | 514   | +222   | +76  | 1,004  | +581   | +199 |
|             | Styrene                           | 3,353 | 5,430 | +2,077 | +62  | 4,504 | +1151  | +34  | 13,492 | +8,062 | +240 |
|             | Phenol                            | n.d.  | n.d.  | n.d.   | n.d. | n.d.  | n.d.   | n.d. | n.d.   | n.d.   | n.d. |
|             | Benzenebutanenitrile              | n.d.  | n.d.  | n.d.   | n.d. | n.d.  | n.d.   | n.d. | n.d.   | n.d.   | n.d. |
|             | ∑aromatic validation<br>compounds | 3,847 | 6,141 | +2,294 | +150 | 5,368 | +1,522 | +40  | 15,179 | +9,039 | +636 |
|             | Nonadecane                        | 16    | 20    | +3     | +22  | 17    | +1     | +9   | 62     | +46    | +284 |
|             | Eicosane                          | 30    | 40    | +9     | +31  | 35    | +5     | +17  | 125    | +95    | +313 |
|             | Heneicosane                       | 67    | 36    | -31    | -46  | 62    | -6     | -8   | 300    | +233   | +346 |
|             | Tricosane                         | 80    | 48    | -32    | -40  | 81    | +1     | +2   | 396    | +316   | +395 |
|             | Tetracosane                       | 70    | 44    | -26    | -37  | 75    | +5     | +7   | 363    | +293   | +420 |
|             | Pentacosane                       | 88    | 37    | -52    | -59  | 75    | -14    | -16  | 470    | +382   | +433 |
|             | Heptacosane                       | 53    | 23    | -30    | -56  | 48    | -5     | -10  | 300    | +247   | +467 |
|             | Nonacosane                        | 43    | 20    | -23    | -54  | 41    | -2     | -5   | 256    | +213   | +498 |
|             | Triacotane                        | 29    | 13    | -17    | -57  | 26    | -4     | -12  | 162    | +132   | +453 |
|             | ∑aliphatic validation             | 477   | 280   | -197   | -41  | 459   | -18    | -4   | 2,433  | +1,956 | +411 |

|                        |                        |        |        |        |      |        |        |      |        |         |        |
|------------------------|------------------------|--------|--------|--------|------|--------|--------|------|--------|---------|--------|
|                        | compounds              |        |        |        |      |        |        |      |        |         |        |
|                        | ∑ validation compounds | 4,323  | 6,420  | 2,097  | 49   | 5,827  | +1,504 | +35  | 17,612 | +13,289 | +307   |
| <b>ID1<br/>(x10)</b>   | Toluene                | 166    | 238    | +72    | +43  | 289    | +123   | +74  | 2,035  | +1,869  | +1,126 |
|                        | Ethylbenzene           | 3,247  | 4,697  | +1,450 | +45  | 5,708  | +2,461 | +76  | 6,953  | +3,706  | +114   |
|                        | Styrene                | 8,909  | 14,427 | +5,518 | +62  | 11,968 | +3,059 | +34  | 22,362 | +13,453 | +151   |
|                        | Phenol                 | 82     | 65     | -17    | -21  | 58     | -24    | -29  | 128    | +46     | +56    |
|                        | Benzenebutanenitrile   | n.d.   | n.d.   | n.d.   | n.d. | n.d.   | n.d.   | n.d. | n.d.   | n.d.    | n.d.   |
|                        | ∑ validation compounds | 12,404 | 19,426 | +7,022 | +57  | 18,023 | +5,618 | +45  | 31,478 | +19,073 | +154   |
| <b>ID11<br/>(1/10)</b> | Toluene                | 25     | 36     | +11    | +43  | 43     | +18    | +74  | 38     | +13     | +52    |
|                        | Ethylbenzene           | n.d.   | n.d.   | n.d.   | n.d. | n.d.   | n.d.   | n.d. | n.d.   | n.d.    | n.d.   |
|                        | Styrene                | 177    | 287    | +110   | +62  | 238    | +61    | +34  | 319    | +142    | +80    |
|                        | Phenol                 | 122    | 97     | -25    | -21  | 86     | -36    | -29  | 136    | +14     | +12    |
|                        | Benzenebutanenitrile   | n.d.   | n.d.   | n.d.   | n.d. | n.d.   | n.d.   | n.d. | n.d.   | n.d.    | n.d.   |

|                                  |     |     |     |     |     |     |     |     |      |     |
|----------------------------------|-----|-----|-----|-----|-----|-----|-----|-----|------|-----|
| $\Sigma$ validation<br>compounds | 324 | 419 | +95 | +29 | 367 | +43 | +13 | 493 | +169 | +52 |
|----------------------------------|-----|-----|-----|-----|-----|-----|-----|-----|------|-----|

Table S5. Quantification (in wt%) of the calibrated five aromatic and twelve aliphatic validation compounds for the thirteen studied pyrolysis oils: (a) prepared concentration, (b) calculated concentration obtained with the proposed quantification methodology (using the correction factor), (c) calculated concentration obtained with the proposed quantification methodology (without using the correction factor), (d) concentration based on the hypothesis that area% is equal to weight%. "n.d." corresponds to those compounds which are "not detected" in the GC-MS.

|     |                               | (a)                              | (b)                                           | (c)                                          | (d)                            |
|-----|-------------------------------|----------------------------------|-----------------------------------------------|----------------------------------------------|--------------------------------|
| ID# | Validation compounds          | wt%                              | wt%                                           | wt%                                          | wt%                            |
|     |                               | prepared<br>( $\mu\text{g/mL}$ ) | calculated<br>with CF<br>( $\mu\text{g/mL}$ ) | calculated<br>w/o CF<br>( $\mu\text{g/mL}$ ) | =area%<br>( $\mu\text{g/mL}$ ) |
| ID1 | Toluene                       | 0.7                              | 1.0                                           | 1.2                                          | 3                              |
|     | Ethylbenzene                  | 2.1                              | 3.0                                           | 3.6                                          | 9                              |
|     | Styrene                       | 4.1                              | 6.6                                           | 5.5                                          | 20                             |
|     | Phenol                        | n.d.                             | n.d.                                          | n.d.                                         | n.d.                           |
|     | Benzenebutanenitrile          | n.d.                             | n.d.                                          | n.d.                                         | n.d.                           |
|     | $\Sigma$ validation compounds | 6.9                              | 10.6                                          | 10.3                                         | 31.4                           |
| ID2 | Toluene                       | 0.2                              | 0.3                                           | 0.4                                          | 1                              |
|     | Ethylbenzene                  | n.d.                             | n.d.                                          | n.d.                                         | n.d.                           |
|     | Styrene                       | 1                                | 1                                             | 1                                            | 3                              |
|     | Phenol                        | 16                               | 13                                            | 12                                           | 32                             |
|     | Benzenebutanenitrile          | n.d.                             | n.d.                                          | n.d.                                         | n.d.                           |
|     | $\Sigma$ validation compounds | 18                               | 15                                            | 13                                           | 36                             |
| ID3 | Toluene                       | 1                                | 1                                             | 2                                            | 5                              |
|     | Ethylbenzene                  | 2                                | 3                                             | 3                                            | 10                             |
|     | Styrene                       | 4                                | 7                                             | 5                                            | 24                             |

|            |                               |      |      |      |      |
|------------|-------------------------------|------|------|------|------|
|            | Phenol                        | 1    | 1    | 1    | 4    |
|            | Benzenebutanenitrile          | n.d. | n.d. | n.d. | n.d. |
|            | $\Sigma$ validation compounds | 8    | 12   | 11   | 43   |
| <b>ID4</b> | Toluene                       | 0.03 | 0.04 | 0.04 | 0.07 |
|            | Ethylbenzene                  | n.d. | n.d. | n.d. | n.d. |
|            | Styrene                       | n.d. | n.d. | n.d. | n.d. |
|            | Phenol                        | 16   | 13   | 11   | 32   |
|            | Benzenebutanenitrile          | n.d. | n.d. | n.d. | n.d. |
|            | $\Sigma$ validation compounds | 16   | 13   | 12   | 32   |
| <b>ID5</b> | Toluene                       | 1    | 2    | 2    | 3    |
|            | Ethylbenzene                  | 4    | 6    | 7    | 10   |
|            | Styrene                       | 9    | 14   | 12   | 25   |
|            | Phenol                        | 1    | 1    | 0    | 1    |
|            | Benzenebutanenitrile          | n.d. | n.d. | n.d. | n.d. |
|            | $\Sigma$ validation compounds | 15   | 22   | 21   | 40   |
| <b>ID6</b> | Toluene                       | 2    | 2    | 3    | 4    |
|            | Ethylbenzene                  | 4    | 5    | 7    | 9    |
|            | Styrene                       | 13   | 22   | 18   | 38   |
|            | Phenol                        | n.d. | n.d. | n.d. | n.d. |
|            | Benzenebutanenitrile          | n.d. | n.d. | n.d. | n.d. |
|            | $\Sigma$ validation compounds | 37   | 58   | 27   | 102  |
| <b>ID7</b> | Toluene                       | 4    | 6    | 7    | 9    |
|            | Ethylbenzene                  | 4    | 6    | 8    | 11   |
|            | Styrene                       | 14   | 23   | 19   | 41   |
|            | Phenol                        | 6    | 5    | 4    | 11   |

|             |                               |     |     |     |    |
|-------------|-------------------------------|-----|-----|-----|----|
|             | Benzenebutanenitrile          | 1   | 1   | 1   | 3  |
|             | $\Sigma$ validation compounds | 30  | 41  | 39  | 76 |
| <b>ID8</b>  | Toluene                       | 4   | 6   | 8   | 9  |
|             | Ethylbenzene                  | 7   | 10  | 12  | 15 |
|             | Styrene                       | 15  | 24  | 20  | 37 |
|             | Phenol                        | 4   | 3   | 3   | 7  |
|             | Benzenebutanenitrile          | 1   | 1   | 1   | 3  |
|             | $\Sigma$ validation compounds | 32  | 44  | 44  | 72 |
| <b>ID9</b>  | Toluene                       | 4   | 6   | 7   | 8  |
|             | Ethylbenzene                  | 6   | 9   | 11  | 13 |
|             | Styrene                       | 19  | 31  | 25  | 45 |
|             | Phenol                        | 7   | 6   | 5   | 11 |
|             | Benzenebutanenitrile          | 0.5 | 0.2 | 0.4 | 1  |
|             | $\Sigma$ validation compounds | 37  | 51  | 49  | 79 |
| <b>ID10</b> | Toluene                       | 4   | 5   | 7   | 7  |
|             | Ethylbenzene                  | 6   | 8   | 10  | 11 |
|             | Styrene                       | 18  | 29  | 24  | 40 |
|             | Phenol                        | 8   | 7   | 6   | 12 |
|             | Benzenebutanenitrile          | 1   | 1   | 1   | 3  |
|             | $\Sigma$ validation compounds | 37  | 50  | 48  | 73 |
| <b>ID11</b> | Toluene                       | 7   | 10  | 12  | 9  |
|             | Ethylbenzene                  | 12  | 17  | 21  | 16 |
|             | Styrene                       | 26  | 42  | 35  | 42 |
|             | Phenol                        | 8   | 6   | 6   | 8  |
|             | Benzenebutanenitrile          | 1   | 0.3 | 0.6 | 1  |

|                      |                                            | $\Sigma$ validation<br>compounds | 53   | 75   | 73   | 77 |
|----------------------|--------------------------------------------|----------------------------------|------|------|------|----|
| <b>ID12</b>          | Toluene                                    | 1                                | 1    | 1    | 2    |    |
|                      | Ethylbenzene                               | 1                                | 1    | 1    | 3    |    |
|                      | Styrene                                    | 9                                | 15   | 13   | 38   |    |
|                      | Phenol                                     | n.d.                             | n.d. | n.d. | n.d. |    |
|                      | Benzenebutanenitrile                       | n.d.                             | n.d. | n.d. | n.d. |    |
|                      | $\Sigma$ aromatic validation<br>compounds  | 11                               | 17   | 15   | 43   |    |
|                      | Nonadecane                                 | 0.0                              | 0.1  | 0.0  | 0.2  |    |
|                      | Eicosane                                   | 0.1                              | 0.1  | 0.1  | 0.4  |    |
|                      | Heneicosane                                | 0.2                              | 0.1  | 0.2  | 0.8  |    |
|                      | Tricosane                                  | 0.2                              | 0.1  | 0.2  | 1.1  |    |
|                      | Tetracosane                                | 0.2                              | 0.1  | 0.2  | 1.0  |    |
|                      | Pentacosane                                | 0.2                              | 0.1  | 0.2  | 1.3  |    |
|                      | Heptacosane                                | 0.1                              | 0.1  | 0.1  | 0.8  |    |
|                      | Nonacosane                                 | 0.1                              | 0.1  | 0.1  | 0.7  |    |
|                      | triacontane                                | 0.1                              | 0.0  | 0.1  | 0.5  |    |
|                      | $\Sigma$ aliphatic validation<br>compounds | 1.3                              | 0.8  | 1.3  | 6.9  |    |
|                      | $\Sigma$ validation<br>compounds           | 12                               | 18   | 16   | 50   |    |
| <b>ID1<br/>(x10)</b> | Toluene                                    | 0.2                              | 0.2  | 0.3  | 2.0  |    |
|                      | Ethylbenzene                               | 3.2                              | 4.7  | 5.7  | 6.9  |    |
|                      | Styrene                                    | 8.9                              | 14.4 | 11.9 | 22.3 |    |
|                      | Phenol                                     | 0.1                              | 0.1  | 0.1  | 0.1  |    |
|                      | Benzenebutanenitrile                       | n.d.                             | n.d. | n.d. | n.d. |    |
|                      | $\Sigma$ validation                        | 12.4                             | 19.4 | 18.0 | 31.4 |    |



| compounds              |                                  |      |      |      |      |
|------------------------|----------------------------------|------|------|------|------|
| <b>ID11<br/>(1/10)</b> | Toluene                          | 2.4  | 3.5  | 4.2  | 3.7  |
|                        | Ethylbenzene                     | n.d. | n.d. | n.d. | n.d. |
|                        | Styrene                          | 17.4 | 28.1 | 23.3 | 31.3 |
|                        | Phenol                           | 12.0 | 9.5  | 8.4  | 13.4 |
|                        | Benzenebutanenitrile             | n.d. | n.d. | n.d. | n.d. |
|                        | $\Sigma$ validation<br>compounds | 31.8 | 41.1 | 36.0 | 48.3 |

Table S6. Average relative error and standard deviation of the validation compounds for the thirteen studied pyrolysis oils based on the relative error values included in Table S4. (a) Proposed quantification methodology (using the correction factor), (b) proposed quantification methodology without using correction factor and (c) quantification based on peak area % = weight%.

|                            |             | (a)                        | (b) | (c) | (a)                | (b) | (c) |
|----------------------------|-------------|----------------------------|-----|-----|--------------------|-----|-----|
| Validation<br>compounds    | RT<br>(min) | Average relative error (%) |     |     | Standard deviation |     |     |
|                            |             | <b>Aromatic compounds</b>  |     |     |                    |     |     |
| Toluene                    | 8.1         | 43                         | 71  | 158 | 0                  | 9   | 113 |
| Ethylbenzene               | 10.1        | 36                         | 72  | 130 | 17                 | 10  | 130 |
| Styrene                    | 13.2        | 56                         | 37  | 186 | 18                 | 12  | 147 |
| Phenol                     | 28.1        | -21                        | -29 | 64  | 8                  | 0   | 81  |
| Benzenebutanenitrile       | 30.5        | -54                        | -21 | 95  | 0                  | 0   | 67  |
| <b>Aliphatic compounds</b> |             |                            |     |     |                    |     |     |
| Nonadecane                 | 25.8        | 22                         | 9   | 284 |                    |     |     |
| Eicosane                   | 27.9        | 31                         | 17  | 313 |                    |     |     |

|             |      |     |     |     |  |  |  |
|-------------|------|-----|-----|-----|--|--|--|
| Heneicosane | 29.7 | -46 | -8  | 346 |  |  |  |
| Tricosane   | 32.7 | -40 | 2   | 395 |  |  |  |
| Tetracosane | 34.0 | -37 | 7   | 420 |  |  |  |
| Pentacosane | 35.2 | -59 | -16 | 433 |  |  |  |
| Heptacosane | 37.7 | -56 | -10 | 467 |  |  |  |
| Nonacosane  | 41.1 | -54 | -5  | 498 |  |  |  |
| Triacontane | 43.3 | -57 | -12 | 453 |  |  |  |

Table S7. ID2 pyrolysis liquid composition details, where the following information is given for each detected signal: (a) number of signal, (b) retention time, (c) window, (d) compound name, (e) quality match (below or equal and above 85 %), (f) integrated area, (g) area percentage, (h) normalised area to the internal standard, (i) calculated concentration in µg/mL (calculated as normalised area of the compound multiplied by the correction factor and by the response factor (RF)), (j) calculated concentration in µg/mL (calculated as normalised area of the compound without multiplying by the correction factor and multiplying it by the response factor (RF)), (k) concentration (using correction factor) in wt.% and (l) concentration (without using the correction factor) in wt.%.

| (a) | (b)         | (c) | (d)             | (e)              | (f)       | (g)       | (h)           | (i)                    | (j)                   | (k)                  | (l)                 |
|-----|-------------|-----|-----------------|------------------|-----------|-----------|---------------|------------------------|-----------------------|----------------------|---------------------|
| N°  | RT<br>(min) | W   | Compound        | Quality<br>match | Area      | Area<br>% | Norm.<br>Area | [ ] with CF<br>(µg/mL) | [ ] w/o CF<br>(µg/mL) | [ ] with CF<br>(wt%) | [ ] w/o CF<br>(wt%) |
| 1   | 3.4         | 1   |                 | <85%             | 8,478,404 | 1.2       | 2.2           | 115.0                  | 93.7                  | 1.1                  | 0.9                 |
| 2   | 3.6         | 1   |                 | <85%             | 389,761   | 0.1       | 0.1           | 5.3                    | 4.3                   | 0.1                  | 0.0                 |
| 3   | 3.8         | 1   |                 | <85%             | 219,079   | 0.0       | 0.1           | 3.0                    | 2.4                   | 0.0                  | 0.0                 |
| 4   | 4.3         | 1   |                 | <85%             | 796,367   | 0.1       | 0.2           | 10.8                   | 8.8                   | 0.1                  | 0.1                 |
| 5   | 6.1         | 2   |                 | <85%             | 1,580,449 | 0.2       | 0.4           | 11.8                   | 14.3                  | 0.1                  | 0.1                 |
|     | 8.165       | 2   | 1-Propanol (IS) |                  | 3,907,364 |           |               |                        |                       |                      |                     |
| 6   | 8.2         | 2   | Toluene         | ≥85%             | 4,341,545 | 0.6       | 1.1           | 32.4                   | 39.4                  | 1.0                  | 0.4                 |
| 7   | 8.5         | 2   |                 | <85%             | 3,082,994 | 0.4       | 0.8           | 23.0                   | 28.0                  | 0.2                  | 0.3                 |
| 8   | 9.9         | 2   |                 | <85%             | 1,794,514 | 0.2       | 0.5           | 13.4                   | 16.3                  | 0.1                  | 0.2                 |

|    |      |   |                                      |      |            |     |     |       |       |     |     |
|----|------|---|--------------------------------------|------|------------|-----|-----|-------|-------|-----|-----|
| 9  | 10.2 | 2 |                                      | <85% | 7,325,082  | 1.0 | 1.9 | 54.7  | 66.5  | 0.5 | 0.7 |
| 10 | 10.4 | 2 |                                      | <85% | 2,306,154  | 0.3 | 0.6 | 17.2  | 20.9  | 0.2 | 0.2 |
| 11 | 10.6 | 2 |                                      | <85% | 1,944,564  | 0.3 | 0.5 | 14.5  | 17.6  | 0.1 | 0.2 |
| 12 | 10.7 | 2 |                                      | <85% | 1,630,459  | 0.2 | 0.4 | 12.2  | 14.8  | 0.1 | 0.1 |
| 13 | 11.3 | 3 |                                      | <85% | 2,686,443  | 0.4 | 0.7 | 19.2  | 15.9  | 0.2 | 0.2 |
| 14 | 11.6 | 3 |                                      | <85% | 655,399    | 0.1 | 0.2 | 4.7   | 3.9   | 0.0 | 0.0 |
| 15 | 12.1 | 3 |                                      | <85% | 536,623    | 0.1 | 0.1 | 3.8   | 3.2   | 0.0 | 0.0 |
| 16 | 12.4 | 3 |                                      | <85% | 3,625,824  | 0.5 | 0.9 | 25.9  | 21.4  | 0.3 | 0.2 |
| 17 | 12.9 | 3 |                                      | <85% | 1,234,945  | 0.2 | 0.3 | 8.8   | 7.3   | 0.1 | 0.1 |
| 18 | 13.2 | 3 | Styrene                              | ≥85% | 20,540,875 | 2.8 | 5.3 | 146.5 | 121.5 | 1.4 | 1.2 |
| 19 | 13.4 | 3 | Benzene, 1-methyl-2-(1-methylethyl)- | ≥85% | 11,688,975 | 1.6 | 3.0 | 83.4  | 69.1  | 0.8 | 0.7 |
| 20 | 13.7 | 3 |                                      | <85% | 2,214,390  | 0.3 | 0.6 | 15.8  | 13.1  | 0.2 | 0.1 |
| 21 | 14.7 | 3 |                                      | <85% | 7,412,837  | 1.0 | 1.9 | 52.9  | 43.9  | 0.5 | 0.4 |
| 22 | 15.1 | 3 | Benzene, 2,4-diethyl-1-methyl-       | ≥85% | 3,269,022  | 0.5 | 0.8 | 23.3  | 19.3  | 0.2 | 0.2 |
| 23 | 16.2 | 3 |                                      | <85% | 1,267,180  | 0.2 | 0.3 | 9.0   | 7.5   | 0.1 | 0.1 |
| 24 | 16.7 | 3 |                                      | <85% | 1,109,043  | 0.2 | 0.3 | 7.9   | 6.6   | 0.1 | 0.1 |
| 25 | 16.9 | 3 |                                      | <85% | 588,577    | 0.1 | 0.2 | 4.2   | 3.5   | 0.0 | 0.0 |
| 26 | 17.5 | 3 |                                      | <85% | 553,764    | 0.1 | 0.1 | 3.9   | 3.3   | 0.0 | 0.0 |

|    |      |   |                                           |      |            |     |     |       |      |     |     |
|----|------|---|-------------------------------------------|------|------------|-----|-----|-------|------|-----|-----|
| 27 | 17.6 | 3 |                                           | <85% | 3,597,087  | 0.5 | 0.9 | 25.7  | 21.3 | 0.3 | 0.2 |
| 28 | 17.9 | 3 |                                           | <85% | 3,539,243  | 0.5 | 0.9 | 25.2  | 20.9 | 0.2 | 0.2 |
| 29 | 18.8 | 3 |                                           | <85% | 408,916    | 0.1 | 0.1 | 2.9   | 2.4  | 0.0 | 0.0 |
| 30 | 18.9 | 3 |                                           | <85% | 1,400,992  | 0.2 | 0.4 | 10.0  | 8.3  | 0.1 | 0.1 |
| 31 | 19.4 | 3 |                                           | <85% | 5,051,258  | 0.7 | 1.3 | 36.0  | 29.9 | 0.4 | 0.3 |
| 32 | 19.5 | 3 |                                           | <85% | 835,919    | 0.1 | 0.2 | 6.0   | 4.9  | 0.1 | 0.0 |
| 33 | 19.6 | 3 |                                           | <85% | 1,055,909  | 0.1 | 0.3 | 7.5   | 6.2  | 0.1 | 0.1 |
| 34 | 20.1 | 3 |                                           | <85% | 4,502,400  | 0.6 | 1.2 | 32.1  | 26.6 | 0.3 | 0.3 |
| 35 | 20.5 | 3 |                                           | <85% | 494,510    | 0.1 | 0.1 | 3.5   | 2.9  | 0.0 | 0.0 |
| 36 | 20.9 | 3 |                                           | <85% | 1,861,637  | 0.3 | 0.5 | 13.3  | 11.0 | 0.1 | 0.1 |
| 37 | 21.2 | 4 |                                           | <85% | 1,003,625  | 0.1 | 0.3 | 5.6   | 5.0  | 0.1 | 0.0 |
| 38 | 21.4 | 4 |                                           | <85% | 4,055,193  | 0.6 | 1.0 | 22.8  | 20.3 | 0.2 | 0.2 |
| 39 | 22.1 | 4 | 1H-Inden-1-one, 2,3-dihydro-3,3-dimethyl- | ≥85% | 3,815,697  | 0.5 | 1.0 | 21.4  | 19.1 | 0.2 | 0.2 |
| 40 | 22.2 | 4 |                                           | <85% | 853,241    | 0.1 | 0.2 | 4.8   | 4.3  | 0.0 | 0.0 |
| 41 | 23.2 | 4 |                                           | <85% | 1,133,817  | 0.2 | 0.3 | 6.4   | 5.7  | 0.1 | 0.1 |
| 42 | 23.3 | 4 |                                           | <85% | 4,951,038  | 0.7 | 1.3 | 27.8  | 24.8 | 0.3 | 0.2 |
| 43 | 24.1 | 4 |                                           | <85% | 430,292    | 0.1 | 0.1 | 2.4   | 2.2  | 0.0 | 0.0 |
| 44 | 24.3 | 4 | Naphthalene, 1,2,3,4-tetrahydro-1,1,6-    | ≥85% | 19,098,937 | 2.6 | 4.9 | 107.4 | 95.7 | 1.1 | 0.9 |

|    |      |   |                                     |      |             |      |      |         |        |      |      |
|----|------|---|-------------------------------------|------|-------------|------|------|---------|--------|------|------|
|    |      |   | trimethyl-                          |      |             |      |      |         |        |      |      |
| 45 | 24.9 | 4 |                                     | <85% | 637,918     | 0.1  | 0.2  | 3.6     | 3.2    | 0.0  | 0.0  |
| 46 | 25.4 | 4 |                                     | <85% | 747,584     | 0.1  | 0.2  | 4.2     | 3.7    | 0.0  | 0.0  |
| 47 | 25.8 | 4 |                                     | <85% | 886,064     | 0.1  | 0.2  | 5.0     | 4.4    | 0.0  | 0.0  |
| 48 | 26.0 | 4 | Phenol, 3,5-dimethyl-               | ≥85% | 7,903,902   | 1.1  | 2.0  | 44.4    | 39.6   | 0.4  | 0.4  |
| 49 | 26.2 | 4 |                                     | <85% | 903,824     | 0.1  | 0.2  | 5.1     | 4.5    | 0.1  | 0.0  |
| 50 | 26.6 | 4 |                                     | <85% | 1,551,244   | 0.2  | 0.4  | 8.7     | 7.8    | 0.1  | 0.1  |
| 51 | 26.9 | 4 |                                     | <85% | 2,005,240   | 0.3  | 0.5  | 11.3    | 10.0   | 0.1  | 0.1  |
| 52 | 27.5 | 4 |                                     | <85% | 417,527     | 0.1  | 0.1  | 2.3     | 2.1    | 0.0  | 0.0  |
| 53 | 27.9 | 4 | Phenol                              | ≥85% | 235,762,525 | 32.5 | 60.3 | 1,325.3 | 1181.2 | 13.1 | 11.6 |
| 54 | 29.1 | 5 | Phenol, 2-ethyl-                    | ≥85% | 13,589,122  | 1.9  | 3.5  | 29.1    | 49.5   | 0.3  | 0.5  |
| 55 | 29.4 | 5 | Phenol, 4-methyl-                   | ≥85% | 44,701,431  | 6.2  | 11.4 | 95.8    | 162.8  | 0.9  | 1.6  |
| 56 | 29.8 | 5 |                                     | <85% | 1,045,352   | 0.1  | 0.3  | 2.2     | 3.8    | 0.0  | 0.0  |
| 57 | 30.3 | 5 |                                     | <85% | 7,199,355   | 1.0  | 1.8  | 15.4    | 26.2   | 0.2  | 0.3  |
| 58 | 30.7 | 5 |                                     | <85% | 3,416,080   | 0.5  | 0.9  | 7.3     | 12.4   | 0.1  | 0.1  |
| 59 | 30.9 | 5 | Phenol, 2-ethyl-                    | ≥85% | 19,333,338  | 2.7  | 4.9  | 41.4    | 70.4   | 0.4  | 0.7  |
| 60 | 31.2 | 5 | Phenol, 2-methyl-5-(1-methylethyl)- | ≥85% | 7,788,397   | 1.1  | 2.0  | 16.7    | 28.4   | 0.2  | 0.3  |
| 61 | 31.4 | 5 |                                     | <85% | 1,519,936   | 0.2  | 0.4  | 3.3     | 5.5    | 0.0  | 0.1  |

|                                                        |      |   |                            |      |             |      |      |                |                |             |             |
|--------------------------------------------------------|------|---|----------------------------|------|-------------|------|------|----------------|----------------|-------------|-------------|
| 62                                                     | 31.5 | 5 | Phenol, 4-(1-methylethyl)- | ≥85% | 129,189,738 | 17.8 | 33.1 | 276.8          | 470.6          | 2.7         | 4.6         |
| 63                                                     | 32.3 | 5 |                            | <85% | 5,503,822   | 0.8  | 1.4  | 11.8           | 20.0           | 0.1         | 0.2         |
| 64                                                     | 32.5 | 5 |                            | <85% | 8,519,770   | 1.2  | 2.2  | 18.3           | 31.0           | 0.2         | 0.3         |
| 65                                                     | 32.8 | 5 |                            | <85% | 1,562,301   | 0.2  | 0.4  | 3.3            | 5.7            | 0.0         | 0.1         |
| 66                                                     | 32.9 | 5 |                            | <85% | 1,983,350   | 0.3  | 0.5  | 4.3            | 7.2            | 0.0         | 0.1         |
| 67                                                     | 34.7 | 5 |                            | <85% | 20,610,909  | 2.8  | 5.3  | 44.2           | 75.1           | 0.4         | 0.7         |
| 68                                                     | 35.3 | 6 |                            | <85% | 3,758,969   | 0.5  | 1.0  | 5.2            | 10.6           | 0.1         | 0.1         |
| 69                                                     | 36.9 | 6 | Benzenamine, 2,5-dichloro- | ≥85% | 6,405,063   | 0.9  | 1.6  | 8.8            | 18.0           | 0.1         | 0.2         |
| 70                                                     | 40.4 | 6 |                            | <85% | 45,466,892  | 6.3  | 11.6 | 62.6           | 127.8          | 0.6         | 1.3         |
| 71                                                     | 41.7 | 6 |                            | <85% | 4,121,265   | 0.6  | 1.1  | 5.7            | 11.6           | 0.1         | 0.1         |
| <b>Total</b>                                           |      |   |                            |      |             |      |      | <b>3,145.6</b> | <b>3,371.6</b> | <b>31.7</b> | <b>33.2</b> |
| Identified signals                                     |      |   |                            |      |             |      |      | 2,252.7        | 2,384.6        | 22.8        | 23.5        |
| Unknown signals                                        |      |   |                            |      |             |      |      | 892.9          | 987.0          | 8.9         | 9.7         |
| Unknown % = 100*Unknown signals/Total detected signals |      |   |                            |      |             |      |      | 28.4           | 29.3           | 28.1        | 29.2        |

Table S8. ID3 pyrolysis liquid composition details, where the following information is given for each detected signal: (a) number of signal, (b) retention time, (c) window, (d) compound name, (e) quality match (below or equal and above 85 %), (f) integrated area, (g) area percentage, (h) normalised area to the internal standard, (i) calculated concentration in µg/mL (calculated as normalised area of the compound multiplied by the correction factor and by the response factor (RF)), (j) calculated concentration in µg/mL (calculated as normalised area of the compound without multiplying by the correction factor and multiplying it by the response factor (RF)), (k) concentration (using correction factor) in wt.% and (l) concentration (without using the correction factor) in wt.%.

| (a) | (b)         | (c) | (d)             | (e)              | (f)        | (g)       | (h)           | (i)                    | (j)                   | (k)                  | (l)                 |
|-----|-------------|-----|-----------------|------------------|------------|-----------|---------------|------------------------|-----------------------|----------------------|---------------------|
| N°  | RT<br>(min) | W   | Compound        | Quality<br>match | Area       | Area<br>% | Norm.<br>Area | [ ] with CF<br>(µg/mL) | [ ] w/o CF<br>(µg/mL) | [ ] with CF<br>(wt%) | [ ] w/o CF<br>(wt%) |
| 1   | 3.5         | 1   |                 | <85%             | 2,955,882  | 1.4       | 1.5           | 80.5                   | 65.6                  | 0.7                  | 0.6                 |
| 2   | 3.6         | 1   |                 | <85%             | 483,302    | 0.2       | 0.2           | 13.2                   | 10.7                  | 0.1                  | 0.1                 |
| 3   | 3.8         | 1   |                 | <85%             | 198,270    | 0.1       | 0.1           | 5.4                    | 4.4                   | 0.0                  | 0.0                 |
| 4   | 4.3         | 1   |                 | <85%             | 370,145    | 0.2       | 0.2           | 10.1                   | 8.2                   | 0.1                  | 0.1                 |
| 5   | 6.1         | 2   |                 | <85%             | 1,867,679  | 0.9       | 1.0           | 28.0                   | 34.0                  | 0.3                  | 0.3                 |
|     | 8.2         | 2   | 1-Propanol (IS) |                  | 1,946,544  |           |               |                        |                       |                      |                     |
| 6   | 8.1         | 2   | Toluene         | ≥85%             | 10,685,282 | 5.1       | 5.5           | 160.1                  | 194.6                 | 1.4                  | 1.7                 |
| 7   | 9.9         | 2   |                 | <85%             | 2,162,257  | 1.0       | 1.1           | 32.4                   | 39.4                  | 0.3                  | 0.4                 |
| 8   | 10.2        | 2   | Ethylbenzene    | ≥85%             | 20,296,470 | 9.6       | 10.4          | 304.2                  | 369.7                 | 2.7                  | 3.3                 |



|    |      |   |                                       |      |            |      |      |       |       |     |     |
|----|------|---|---------------------------------------|------|------------|------|------|-------|-------|-----|-----|
| 9  | 10.4 | 2 |                                       | <85% | 980,516    | 0.5  | 0.5  | 14.7  | 17.9  | 0.1 | 0.2 |
| 10 | 10.6 | 2 |                                       | <85% | 1,342,945  | 0.6  | 0.7  | 20.1  | 24.5  | 0.2 | 0.2 |
| 11 | 11.3 | 3 |                                       | <85% | 3,119,385  | 1.5  | 1.6  | 44.7  | 37.0  | 0.4 | 0.3 |
| 12 | 11.6 | 3 |                                       | <85% | 1,653,193  | 0.8  | 0.8  | 23.7  | 19.6  | 0.2 | 0.2 |
| 13 | 12.1 | 3 |                                       | <85% | 643,844    | 0.3  | 0.3  | 9.2   | 7.6   | 0.1 | 0.1 |
| 14 | 13.2 | 3 | Styrene                               | ≥85% | 51,396,512 | 24.4 | 26.4 | 735.7 | 610.3 | 6.6 | 5.5 |
| 15 | 15.7 | 3 |                                       | <85% | 10,860,507 | 5.2  | 5.6  | 155.5 | 129.0 | 1.4 | 1.2 |
| 16 | 20.4 | 3 |                                       | <85% | 7,743,621  | 3.7  | 4.0  | 110.8 | 92.0  | 1.0 | 0.8 |
| 17 | 22.6 | 4 | Pyridine, 2-methyl-                   | ≥85% | 3,196,154  | 1.5  | 1.6  | 36.1  | 32.1  | 0.3 | 0.3 |
| 18 | 23.8 | 4 |                                       | <85% | 2,284,319  | 1.1  | 1.2  | 25.8  | 23.0  | 0.2 | 0.2 |
| 19 | 24.3 | 4 |                                       | <85% | 3,427,957  | 1.6  | 1.8  | 38.7  | 34.5  | 0.3 | 0.3 |
| 20 | 25.4 | 4 |                                       | <85% | 3,333,937  | 1.6  | 1.7  | 37.6  | 33.5  | 0.3 | 0.3 |
| 21 | 28.1 | 4 | Phenol                                | ≥85% | 7,759,339  | 3.7  | 4.0  | 87.6  | 78.0  | 0.8 | 0.7 |
| 22 | 29.5 | 5 |                                       | <85% | 5,204,256  | 2.5  | 2.7  | 22.4  | 38.1  | 0.2 | 0.3 |
| 23 | 31.5 | 5 |                                       | <85% | 733,249    | 0.3  | 0.4  | 3.2   | 5.4   | 0.0 | 0.0 |
| 24 | 31.6 | 5 |                                       | <85% | 2,012,121  | 1.0  | 1.0  | 8.7   | 14.7  | 0.1 | 0.1 |
| 25 | 32.2 | 5 | Benzene, 1,1'-(1,3-propanediyl)bis-   | ≥85% | 26,753,975 | 12.7 | 13.7 | 115.1 | 195.6 | 1.0 | 1.7 |
| 26 | 32.9 | 5 | 1H-Isoindole-1,3(2H)-dione, 2-methyl- | ≥85% | 19,252,658 | 9.1  | 9.9  | 82.8  | 140.8 | 0.7 | 1.3 |

|                                                        |      |   |  |      |            |     |     |                |                |             |             |
|--------------------------------------------------------|------|---|--|------|------------|-----|-----|----------------|----------------|-------------|-------------|
| 27                                                     | 42.0 | 6 |  | <85% | 17,017,827 | 8.1 | 8.7 | 47.1           | 96.0           | 0.4         | 0.9         |
| 28                                                     | 44.4 | 6 |  | <85% | 3,143,888  | 1.5 | 1.6 | 8.7            | 17.7           | 0.1         | 0.2         |
| <b>Total</b>                                           |      |   |  |      |            |     |     | <b>2,261.8</b> | <b>2,373.9</b> | <b>20.2</b> | <b>21.2</b> |
| Identified signals                                     |      |   |  |      |            |     |     | 1521.6         | 1621.1         | 13.5        | 14.5        |
| Unknown signals                                        |      |   |  |      |            |     |     | 740.2          | 752.8          | 6.7         | 6.7         |
| Unknown % = 100*Unknown signals/Total detected signals |      |   |  |      |            |     |     | 32.7           | 31.7           | 33.2        | 31.6        |

Table S9. ID4 pyrolysis liquid composition details, where the following information is given for each detected signal: (a) number of signal, (b) retention time, (c) window, (d) compound name, (e) quality match (below or equal and above 85 %), (f) integrated area, (g) area percentage, (h) normalised area to the internal standard, (i) calculated concentration in µg/mL (calculated as normalised area of the compound multiplied by the correction factor and by the response factor (RF)), (j) calculated concentration in µg/mL (calculated as normalised area of the compound without multiplying by the correction factor and multiplying it by the response factor (RF)), (k) concentration (using correction factor) in wt.%. and (l) concentration (without using the correction factor) in wt.%.

| (a) | (b)         | (c) | (d)      | (e)              | (f)       | (g)       | (h)           | (i)                    | (j)                   | (k)                  | (l)                 |
|-----|-------------|-----|----------|------------------|-----------|-----------|---------------|------------------------|-----------------------|----------------------|---------------------|
| N°  | RT<br>(min) | W   | Compound | Quality<br>match | Area      | Area<br>% | Norm.<br>Area | [ ] with CF<br>(µg/mL) | [ ] w/o CF<br>(µg/mL) | [ ] with<br>CF (wt%) | [ ] w/o CF<br>(wt%) |
| 1   | 3.5         | 1   |          | <85%             | 3,692,926 | 0.9       | 1.9           | 98.5                   | 80.3                  | 0.9                  | 0.7                 |
| 2   | 3.6         | 1   |          | <85%             | 691,344   | 0.2       | 0.3           | 18.4                   | 15.0                  | 0.2                  | 0.1                 |

|    |      |   |                   |      |             |      |      |         |        |      |      |
|----|------|---|-------------------|------|-------------|------|------|---------|--------|------|------|
| 3  | 3.7  | 1 |                   | <85% | 177,201     | 0.0  | 0.1  | 4.7     | 3.9    | 0.0  | 0.0  |
| 4  | 3.9  | 1 |                   | <85% | 282,678     | 0.1  | 0.1  | 7.5     | 6.1    | 0.1  | 0.1  |
| 5  | 4.3  | 1 |                   | <85% | 338,608     | 0.1  | 0.2  | 9.0     | 7.4    | 0.1  | 0.1  |
|    | 8.2  | 2 | 1-Propanol (IS)   |      | 1,985,742   |      |      |         |        |      |      |
| 6  | 8.2  | 2 | Toluene           | ≥85% | 269,527     | 0.1  | 0.1  | 4.0     | 4.8    | 0.0  | 0.0  |
| 7  | 10.2 | 2 |                   | <85% | 581,542     | 0.1  | 0.3  | 8.5     | 10.4   | 0.1  | 0.1  |
| 8  | 10.6 | 2 |                   | <85% | 1,196,196   | 0.3  | 0.6  | 17.6    | 21.4   | 0.2  | 0.2  |
| 9  | 20.2 | 3 |                   | <85% | 6,805,010   | 1.7  | 3.4  | 95.5    | 79.2   | 0.9  | 0.7  |
| 10 | 22.2 | 4 |                   | <85% | 2,546,809   | 0.6  | 1.3  | 28.2    | 25.1   | 0.3  | 0.2  |
| 11 | 24.4 | 4 |                   | <85% | 3,685,181   | 0.9  | 1.9  | 40.8    | 36.3   | 0.4  | 0.3  |
| 12 | 25.9 | 4 |                   | <85% | 1,375,146   | 0.3  | 0.7  | 15.2    | 13.6   | 0.1  | 0.1  |
| 13 | 26.0 | 4 |                   | <85% | 2,650,115   | 0.7  | 1.3  | 29.3    | 26.1   | 0.3  | 0.2  |
| 14 | 26.6 | 4 |                   | <85% | 1,575,527   | 0.4  | 0.8  | 17.4    | 15.5   | 0.2  | 0.1  |
| 15 | 26.9 | 4 |                   | <85% | 2,785,294   | 0.7  | 1.4  | 30.8    | 27.5   | 0.3  | 0.3  |
| 16 | 27.6 | 4 |                   | <85% | 10,147,068  | 2.5  | 5.1  | 112.2   | 100.0  | 1.0  | 0.9  |
| 17 | 28.0 | 4 | Phenol            | ≥85% | 126,591,789 | 31.8 | 63.8 | 1,400.3 | 1248.0 | 12.9 | 11.5 |
| 18 | 29.2 | 5 | Phenol, 2-ethyl-  | ≥85% | 12,176,714  | 3.1  | 6.1  | 51.3    | 87.3   | 0.5  | 0.8  |
| 19 | 29.4 | 5 | Phenol, 4-methyl- | ≥85% | 14,090,809  | 3.5  | 7.1  | 59.4    | 101.0  | 0.5  | 0.9  |

|                                                        |      |   |                                     |      |             |      |      |                |                |             |             |
|--------------------------------------------------------|------|---|-------------------------------------|------|-------------|------|------|----------------|----------------|-------------|-------------|
| 20                                                     | 30.3 | 5 |                                     | <85% | 3,759,541   | 0.9  | 1.9  | 15.9           | 26.9           | 0.1         | 0.2         |
| 21                                                     | 30.5 | 5 |                                     | <85% | 2,212,864   | 0.6  | 1.1  | 9.3            | 15.9           | 0.1         | 0.1         |
| 22                                                     | 30.9 | 5 | Phenol, 4-ethyl-                    | ≥85% | 6,132,215   | 1.5  | 3.1  | 25.9           | 44.0           | 0.2         | 0.4         |
| 23                                                     | 31.3 | 5 | Phenol, 2-methyl-5-(1-methylethyl)- | ≥85% | 9,935,945   | 2.5  | 5.0  | 41.9           | 71.2           | 0.4         | 0.7         |
| 24                                                     | 31.6 | 5 | Phenol, 4-(1-methylethyl)-          | ≥85% | 108,324,064 | 27.2 | 54.6 | 456.8          | 776.4          | 4.2         | 7.1         |
| 25                                                     | 32.1 | 5 |                                     | <85% | 7,034,072   | 1.8  | 3.5  | 29.7           | 50.4           | 0.3         | 0.5         |
| 26                                                     | 32.3 | 5 |                                     | <85% | 2,431,542   | 0.6  | 1.2  | 10.3           | 17.4           | 0.1         | 0.2         |
| 27                                                     | 32.5 | 5 | Phenol, p-tert-butyl-               | ≥85% | 36,738,054  | 9.2  | 18.5 | 154.9          | 263.3          | 1.4         | 2.4         |
| 28                                                     | 34.7 | 5 | p-Isopropenylphenol                 | ≥85% | 30,350,575  | 7.6  | 15.3 | 128.0          | 217.5          | 1.2         | 2.0         |
| <b>Total</b>                                           |      |   |                                     |      |             |      |      | <b>2,921.3</b> | <b>3,392.0</b> | <b>26.8</b> | <b>31.1</b> |
| Identified signals                                     |      |   |                                     |      |             |      |      | 2,322.5        | 2,813.5        | 21.3        | 25.8        |
| Unknown signals                                        |      |   |                                     |      |             |      |      | 598.8          | 578.5          | 5.5         | 5.3         |
| Unknown % = 100*Unknown signals/Total detected signals |      |   |                                     |      |             |      |      | 20.5           | 17.1           | 20.5        | 17.0        |

Table S10. ID5 pyrolysis liquid composition details, where the following information is given for each detected signal: (a) number of signal, (b) retention time, (c) window, (d) compound name, (e) quality match (below or equal and above 85 %), (f) integrated area, (g) area percentage, (h) normalised area to the internal standard, (i) calculated concentration in  $\mu\text{g/mL}$  (calculated as normalised area of the compound multiplied by the correction factor and by the response factor (RF)), (j) calculated concentration in  $\mu\text{g/mL}$  (calculated as normalised area of the compound without multiplying by the correction factor and multiplying it by the response factor (RF)), (k) concentration (using correction factor) in wt.%. and (l) concentration (without using the correction factor) in wt.%.

| (a) | (b)         | (c) | (d)                  | (e)              | (f)        | (g)       | (h)           | (i)                                 | (j)                                | (k)                  | (l)                 |
|-----|-------------|-----|----------------------|------------------|------------|-----------|---------------|-------------------------------------|------------------------------------|----------------------|---------------------|
| N°  | RT<br>(min) | W   | Compound             | Quality<br>match | Area       | Area<br>% | Norm.<br>Area | [ ] with CF<br>( $\mu\text{g/mL}$ ) | [ ] w/o CF<br>( $\mu\text{g/mL}$ ) | [ ] with<br>CF (wt%) | [ ] w/o CF<br>(wt%) |
| 1   | 3.4         | 1   |                      | <85%             | 7,550,614  | 0.8       | 1.5           | 78.9                                | 64.3                               | 0.7                  | 0.6                 |
| 2   | 3.6         | 1   |                      | <85%             | 1,182,458  | 0.1       | 0.2           | 12.4                                | 10.1                               | 0.1                  | 0.1                 |
| 3   | 3.8         | 1   |                      | <85%             | 1,035,531  | 0.1       | 0.2           | 10.8                                | 8.8                                | 0.1                  | 0.1                 |
| 4   | 4.0         | 1   | 3-Penten-1-yne, (E)- | $\geq$ 85%       | 1,588,032  | 0.2       | 0.3           | 16.6                                | 13.5                               | 0.2                  | 0.1                 |
| 5   | 4.3         | 1   |                      | <85%             | 5,603,482  | 0.6       | 1.1           | 58.5                                | 47.7                               | 0.6                  | 0.5                 |
| 6   | 6.0         | 2   |                      | <85%             | 1,739,228  | 0.2       | 0.3           | 10.0                                | 12.2                               | 0.1                  | 0.1                 |
| 7   | 6.1         | 2   | Benzene              | $\geq$ 85%       | 10,631,246 | 1.2       | 2.1           | 61.2                                | 74.3                               | 0.6                  | 0.7                 |
| 8   | 6.3         | 2   |                      | <85%             | 2,924,559  | 0.3       | 0.6           | 16.8                                | 20.4                               | 0.2                  | 0.2                 |
| 9   | 6.4         | 2   |                      | <85%             | 484,148    | 0.1       | 0.1           | 2.8                                 | 3.4                                | 0.0                  | 0.0                 |

|    |      |   |                           |      |             |      |      |       |       |     |     |
|----|------|---|---------------------------|------|-------------|------|------|-------|-------|-----|-----|
| 10 | 7.4  | 2 |                           | <85% | 736,807     | 0.1  | 0.1  | 4.2   | 5.2   | 0.0 | 0.0 |
| 11 | 7.7  | 2 |                           | <85% | 7,820,279   | 0.8  | 1.5  | 45.0  | 54.7  | 0.4 | 0.5 |
| 12 | 8.0  | 2 |                           | <85% | 506,703     | 0.1  | 0.1  | 2.9   | 3.5   | 0.0 | 0.0 |
|    | 8.2  | 2 | 1-Propanol (IS)           |      | 5,071,905   |      |      |       |       |     |     |
| 13 | 8.2  | 2 | Toluene                   | ≥85% | 34,643,321  | 3.8  | 6.8  | 199.3 | 242.2 | 1.9 | 2.3 |
| 14 | 8.5  |   | Water                     | ≥85% | 2,144,492   | 0.2  | 0.4  | 12.3  | 15.0  | 0.1 | 0.1 |
| 15 | 8.7  |   |                           | <85% | 4,566,034   | 0.5  | 0.9  | 26.3  | 31.9  | 0.2 | 0.3 |
| 16 | 8.8  |   |                           | <85% | 1,060,161   | 0.1  | 0.2  | 6.1   | 7.4   | 0.1 | 0.1 |
| 17 | 9.6  |   |                           | <85% | 787,494     | 0.1  | 0.2  | 4.5   | 5.5   | 0.0 | 0.1 |
| 18 | 9.9  |   |                           | <85% | 4,166,254   | 0.5  | 0.8  | 24.0  | 29.1  | 0.2 | 0.3 |
| 19 | 10.2 |   | Ethylbenzene              | ≥85% | 107,250,288 | 11.7 | 21.1 | 616.9 | 749.7 | 5.8 | 7.1 |
| 20 | 10.4 |   |                           | <85% | 2,335,913   | 0.3  | 0.5  | 13.4  | 16.3  | 0.1 | 0.2 |
| 21 | 10.6 |   |                           | <85% | 4,056,525   | 0.4  | 0.8  | 23.3  | 28.4  | 0.2 | 0.3 |
| 22 | 11.1 |   |                           | <85% | 835,868     | 0.1  | 0.2  | 4.6   | 3.8   | 0.0 | 0.0 |
| 23 | 11.3 |   | Benzene, (1-methylethyl)- | ≥85% | 20,203,659  | 2.2  | 4.0  | 111.0 | 92.1  | 1.0 | 0.9 |
| 24 | 11.6 |   |                           | <85% | 2,057,723   | 0.2  | 0.4  | 11.3  | 9.4   | 0.1 | 0.1 |
| 25 | 12.1 |   |                           | <85% | 3,396,481   | 0.4  | 0.7  | 18.7  | 15.5  | 0.2 | 0.1 |
| 26 | 12.5 |   |                           | <85% | 1,985,629   | 0.2  | 0.4  | 10.9  | 9.0   | 0.1 | 0.1 |

|    |      |  |                                     |      |             |      |      |         |        |      |      |
|----|------|--|-------------------------------------|------|-------------|------|------|---------|--------|------|------|
| 27 | 13.2 |  | Styrene                             | ≥85% | 269,501,639 | 29.3 | 53.1 | 1,480.6 | 1228.2 | 14.0 | 11.6 |
| 28 | 14.7 |  | .alpha.-methylstyrene               | ≥85% | 50,124,411  | 5.4  | 9.9  | 275.4   | 228.4  | 2.6  | 2.2  |
| 29 | 17.7 |  |                                     | <85% | 2,472,302   | 0.3  | 0.5  | 13.6    | 11.3   | 0.1  | 0.1  |
| 30 | 18.8 |  |                                     | <85% | 1,266,476   | 0.1  | 0.2  | 7.0     | 5.8    | 0.1  | 0.1  |
| 31 | 20.2 |  |                                     | <85% | 5,839,596   | 0.6  | 1.2  | 32.1    | 26.6   | 0.3  | 0.3  |
| 32 | 25.3 |  |                                     | <85% | 5,905,024   | 0.6  | 1.2  | 25.6    | 22.8   | 0.2  | 0.2  |
| 33 | 25.8 |  |                                     | <85% | 4,239,021   | 0.5  | 0.8  | 18.4    | 16.4   | 0.2  | 0.2  |
| 34 | 28.0 |  | Phenol                              | ≥85% | 13,196,717  | 1.4  | 2.6  | 57.2    | 50.9   | 0.5  | 0.5  |
| 35 | 28.2 |  |                                     | <85% | 7,093,829   | 0.8  | 1.4  | 30.7    | 27.4   | 0.3  | 0.3  |
| 36 | 29.2 |  |                                     | <85% | 1,535,840   | 0.2  | 0.3  | 2.5     | 4.3    | 0.0  | 0.0  |
| 37 | 29.4 |  |                                     | <85% | 2,090,818   | 0.2  | 0.4  | 3.5     | 5.9    | 0.0  | 0.1  |
| 38 | 29.8 |  |                                     | <85% | 5,213,558   | 0.6  | 1.0  | 8.6     | 14.6   | 0.1  | 0.1  |
| 39 | 30.3 |  |                                     | <85% | 1,063,436   | 0.1  | 0.2  | 1.8     | 3.0    | 0.0  | 0.0  |
| 40 | 30.7 |  |                                     | <85% | 1,327,216   | 0.1  | 0.3  | 2.2     | 3.7    | 0.0  | 0.0  |
| 41 | 30.9 |  |                                     | <85% | 2,551,558   | 0.3  | 0.5  | 4.2     | 7.2    | 0.0  | 0.1  |
| 42 | 31.6 |  | Phenol, 3-(1-methylethyl)-          | ≥85% | 5,544,695   | 0.6  | 1.1  | 9.2     | 15.6   | 0.1  | 0.1  |
| 43 | 32.0 |  |                                     | <85% | 4,020,437   | 0.4  | 0.8  | 6.6     | 11.3   | 0.1  | 0.1  |
| 44 | 32.1 |  | Benzene, 1,1'-(1,3-propanediyl)bis- | ≥85% | 103,100,749 | 11.2 | 20.3 | 170.2   | 289.3  | 1.6  | 2.7  |

|                    |      |  |                                    |      |            |     |      |                |               |             |             |
|--------------------|------|--|------------------------------------|------|------------|-----|------|----------------|---------------|-------------|-------------|
| 45                 | 32.8 |  | Dimethyl phthalate                 | ≥85% | 12,555,731 | 1.4 | 2.5  | 20.7           | 35.2          | 0.2         | 0.3         |
| 46                 | 33.0 |  |                                    | <85% | 3,241,439  | 0.4 | 0.6  | 5.4            | 9.1           | 0.1         | 0.1         |
| 47                 | 33.7 |  | Benzoic acid                       | ≥85% | 8,998,232  | 1.0 | 1.8  | 14.9           | 25.2          | 0.1         | 0.2         |
| 48                 | 34.5 |  | Benzene, 1,1'-cyclopropylidenebis- | ≥85% | 43,979,214 | 4.8 | 8.7  | 72.6           | 123.4         | 0.7         | 1.2         |
| 49                 | 35.0 |  |                                    | <85% | 17,657,661 | 1.9 | 3.5  | 18.7           | 38.2          | 0.2         | 0.4         |
| 50                 | 35.3 |  |                                    | <85% | 3,969,539  | 0.4 | 0.8  | 4.2            | 8.6           | 0.0         | 0.1         |
| 51                 | 35.6 |  |                                    | <85% | 7,535,856  | 0.8 | 1.5  | 8.0            | 16.3          | 0.1         | 0.2         |
| 52                 | 36.1 |  |                                    | <85% | 5,874,084  | 0.6 | 1.2  | 6.2            | 12.7          | 0.1         | 0.1         |
| 53                 | 36.8 |  |                                    | <85% | 3,370,680  | 0.4 | 0.7  | 3.6            | 7.3           | 0.0         | 0.1         |
| 54                 | 37.2 |  |                                    | <85% | 4,507,406  | 0.5 | 0.9  | 4.8            | 9.8           | 0.0         | 0.1         |
| 55                 | 38.1 |  |                                    | <85% | 6,616,767  | 0.7 | 1.3  | 7.0            | 14.3          | 0.1         | 0.1         |
| 56                 | 39.5 |  |                                    | <85% | 53,533,130 | 5.8 | 10.6 | 56.8           | 115.9         | 0.5         | 1.1         |
| 57                 | 40.5 |  |                                    | <85% | 14,477,355 | 1.6 | 2.9  | 15.4           | 31.4          | 0.1         | 0.3         |
| 58                 | 41.8 |  |                                    | <85% | 34,44,987  | 0.4 | 0.7  | 3.7            | 7.5           | 0.0         | 0.1         |
| 59                 | 42.1 |  |                                    | <85% | 6,002,388  | 0.7 | 1.2  | 6.4            | 13.0          | 0.1         | 0.1         |
| 60                 | 46.0 |  |                                    | <85% | 7,403,629  | 0.8 | 1.5  | 7.9            | 16.0          | 0.1         | 0.2         |
| <b>Total</b>       |      |  |                                    |      |            |     |      | <b>3,808.0</b> | <b>4030.1</b> | <b>36.0</b> | <b>38.1</b> |
| Identified signals |      |  |                                    |      |            |     |      | 3,118.1        | 3,183.0       | 29.4        | 30.0        |



|                                                        |       |       |      |      |
|--------------------------------------------------------|-------|-------|------|------|
| Unknown signals                                        | 689.9 | 847.1 | 6.6  | 8.1  |
| Unknown % = 100*Unknown signals/Total detected signals | 18.1  | 21.0  | 18.3 | 21.3 |

Table S11. ID6 pyrolysis liquid composition details, where the following information is given for each detected signal: (a) number of signal, (b) retention time, (c) window, (d) compound name, (e) quality match (below or equal and above 85 %), (f) integrated area, (g) area percentage, (h) normalised area to the internal standard, (i) calculated concentration in µg/mL (calculated as normalised area of the compound multiplied by the correction factor and by the response factor (RF)), (j) calculated concentration in µg/mL (calculated as normalised area of the compound without multiplying by the correction factor and multiplying it by the response factor (RF)), (k) concentration (using correction factor) in wt.%. and (l) concentration (without using the correction factor) in wt.%.

| (a) | (b)      | (c) | (d)      | (e)           | (f)       | (g)    | (h)        | (i)                 | (j)                | (k)               | (l)              |
|-----|----------|-----|----------|---------------|-----------|--------|------------|---------------------|--------------------|-------------------|------------------|
| N°  | RT (min) | W   | Compound | Quality match | Area      | Area % | Norm. Area | [ ] with CF (µg/mL) | [ ] w/o CF (µg/mL) | [ ] with CF (wt%) | [ ] w/o CF (wt%) |
| 1   | 3.5      | 1   |          | <85%          | 4,663,322 | 1.1    | 2.3        | 122.6               | 100.0              | 1.2               | 1.0              |
| 2   | 3.6      | 1   |          | <85%          | 1,071,292 | 0.3    | 0.5        | 28.2                | 23.0               | 0.3               | 0.2              |
| 3   | 3.7      | 1   |          | <85%          | 134,808   | 0.0    | 0.1        | 3.5                 | 2.9                | 0.0               | 0.0              |
| 4   | 3.8      | 1   |          | <85%          | 311,252   | 0.1    | 0.2        | 8.2                 | 6.7                | 0.1               | 0.1              |

|    |      |   |                                     |      |             |      |      |         |        |      |      |
|----|------|---|-------------------------------------|------|-------------|------|------|---------|--------|------|------|
| 5  | 4.3  | 1 |                                     | <85% | 787,015     | 0.2  | 0.4  | 20.7    | 16.9   | 0.2  | 0.2  |
| 6  | 6.1  | 2 | Benzene                             | ≥85% | 4,841,728   | 1.2  | 2.4  | 70.1    | 85.2   | 0.7  | 0.8  |
| 7  | 7.7  | 2 |                                     | <85% | 1,001,420   | 0.2  | 0.5  | 14.5    | 17.6   | 0.1  | 0.2  |
|    | 8.2  | 2 | 1-Propanol (IS)                     |      | 2,015,396   |      |      |         |        |      |      |
| 8  | 8.2  | 2 | Toluene                             | ≥85% | 15,256,441  | 3.6  | 7.6  | 220.8   | 268.4  | 2.2  | 2.6  |
| 9  | 8.7  | 2 |                                     | <85% | 1,648,003   | 0.4  | 0.8  | 23.9    | 29.0   | 0.2  | 0.3  |
| 10 | 9.9  | 2 |                                     | <85% | 1,180,306   | 0.3  | 0.6  | 17.1    | 20.8   | 0.2  | 0.2  |
| 11 | 10.2 | 2 | Ethylbenzene                        | ≥85% | 38,713,173  | 9.2  | 19.2 | 560.4   | 681.0  | 5.5  | 6.6  |
| 12 | 11.3 | 3 | Benzene, (1-methylethyl)-           | ≥85% | 5,029,532   | 1.2  | 2.5  | 69.5    | 57.7   | 0.7  | 0.6  |
| 13 | 12.1 | 3 |                                     | <85% | 885,639     | 0.2  | 0.4  | 12.2    | 10.2   | 0.1  | 0.1  |
| 14 | 13.2 | 3 | Styrene                             | ≥85% | 160,294,456 | 38.1 | 79.5 | 2,216.1 | 1838.4 | 21.6 | 17.9 |
| 15 | 16.2 | 3 | .alpha.-methylstyrene               | ≥85% | 36,295,270  | 8.6  | 18.0 | 501.8   | 416.3  | 4.9  | 4.1  |
| 16 | 20.5 | 3 |                                     | <85% | 5,264,656   | 1.3  | 2.6  | 72.8    | 60.4   | 0.7  | 0.6  |
| 17 | 28.5 | 4 |                                     | <85% | 9,260,952   | 2.2  | 4.6  | 100.9   | 90.0   | 1.0  | 0.9  |
| 18 | 30.4 | 5 |                                     | <85% | 9,205,097   | 2.2  | 4.6  | 38.2    | 65.0   | 0.4  | 0.6  |
| 19 | 32.5 | 5 | Benzene, 1,1'-(1,3-propanediyl)bis- | ≥85% | 45,480,208  | 10.8 | 22.6 | 189.0   | 321.2  | 1.8  | 3.1  |
| 20 | 33.0 | 5 |                                     | <85% | 21,550,257  | 5.1  | 10.7 | 89.5    | 152.2  | 0.9  | 1.5  |
| 21 | 34.7 | 5 | Benzoic acid                        | ≥85% | 15,569,545  | 3.7  | 7.7  | 64.7    | 109.9  | 0.6  | 1.1  |

|                                                        |                |               |             |             |
|--------------------------------------------------------|----------------|---------------|-------------|-------------|
| <b>Total</b>                                           | <b>4,558.3</b> | <b>4604.0</b> | <b>44.4</b> | <b>44.8</b> |
| Identified signals                                     | 3,892.4        | 3,778.1       | 38.0        | 36.8        |
| Unknown signals                                        | 665.9          | 825.9         | 6.4         | 8.0         |
| Unknown % = 100*Unknown signals/Total detected signals | 14.6           | 17.9          | 14.4        | 17.9        |

Table S12. ID7 pyrolysis liquid composition details, where the following information is given for each detected signal: (a) number of signal, (b) retention time, (c) window, (d) compound name, (e) quality match (below or equal and above 85 %), (f) integrated area, (g) area percentage, (h) normalised area to the internal standard, (i) calculated concentration in µg/mL (calculated as normalised area of the compound multiplied by the correction factor and by the response factor (RF)), (j) calculated concentration in µg/mL (calculated as normalised area of the compound without multiplying by the correction factor and multiplying it by the response factor (RF)), (k) concentration (using correction factor) in wt.% and (l) concentration (without using the correction factor) in wt.%.

| (a) | (b)      | (c) | (d)              | (e)           | (f)       | (g)    | (h)        | (i)                 | (j)                | (k)               | (l)              |
|-----|----------|-----|------------------|---------------|-----------|--------|------------|---------------------|--------------------|-------------------|------------------|
| N°  | RT (min) | W   | Compound         | Quality match | Area      | Area % | Norm. Area | [ ] with CF (µg/mL) | [ ] w/o CF (µg/mL) | [ ] with CF (wt%) | [ ] w/o CF (wt%) |
| 1   | 6.1      | 2   |                  | <85%          | 1,535,572 | 0.2    | 0.5        | 15.5                | 18.8               | 0.1               | 0.2              |
| 2   | 7.2      | 2   | 2-Propenenitrile | ≥85%          | 2,163,310 | 0.3    | 0.7        | 20.1                | 24.4               | 0.2               | 0.2              |

|                                                        |      |   |                               |      |            |      |      |                |               |             |             |
|--------------------------------------------------------|------|---|-------------------------------|------|------------|------|------|----------------|---------------|-------------|-------------|
| 3                                                      | 7.4  | 2 | 2-Butenoic acid, methyl ester | <85% | 8,340,156  | 1.2  | 2.7  | 78.3           | 95.1          | 0.7         | 0.9         |
|                                                        | 8.1  | 2 | 1-Propanol (IS)               |      | 3,131,298  |      |      |                |               |             |             |
| 4                                                      | 8.1  | 2 | Toluene                       | ≥85% | 64,896,006 | 9.5  | 20.5 | 597.8          | 726.6         | 5.6         | 6.8         |
| 5                                                      | 10.2 | 2 | Ethylbenzene                  | ≥85% | 73,494,583 | 10.9 | 23.7 | 690.5          | 839.1         | 6.5         | 7.8         |
| 6                                                      | 11.3 | 3 | Benzene, (1-methylethyl)      | ≥85% | 10,120,749 | 1.5  | 3.3  | 90.9           | 75.4          | 0.8         | 0.7         |
| 7                                                      | 12.1 | 3 | Benzene, propyl               | ≥85% | 3,459,521  | 0.5  | 1.1  | 30.4           | 25.2          | 0.3         | 0.2         |
| 8                                                      | 13.2 | 3 | Styrene                       | ≥85% | 2.79E+08   | 41.1 | 89.1 | 2,482.1        | 2059.0        | 23.2        | 19.2        |
| 9                                                      | 14.7 | 3 | alfa, methylstyrene           | ≥85% | 66,392,103 | 9.1  | 19.8 | 551.0          | 457.1         | 5.1         | 4.3         |
| 10                                                     | 28.0 | 4 | Phenol                        | ≥85% | 74,003,161 | 11.1 | 24.0 | 526.2          | 469.0         | 4.9         | 4.4         |
| 11                                                     | 29.4 | 5 |                               | <85% | 3,761,116  | 0.6  | 1.2  | 10.1           | 17.2          | 0.1         | 0.2         |
| 12                                                     | 30.2 | 5 | Benzenebutanenitrile          | ≥85% | 20,293,420 | 3.0  | 6.6  | 55.3           | 94.0          | 0.5         | 0.9         |
| 13                                                     | 31.0 | 5 | Phenol, 3-ethyl               | ≥85% | 3,279,205  | 0.5  | 1.0  | 8.6            | 14.6          | 0.1         | 0.1         |
| 14                                                     | 31.6 | 5 | Phenol, 4-(1-methylethyl)     | ≥85% | 34,675,712 | 5.2  | 11.2 | 93.9           | 159.6         | 0.9         | 1.5         |
| 15                                                     | 32.5 | 5 |                               | <85% | 36,104,677 | 5.3  | 11.5 | 96.1           | 163.4         | 0.9         | 1.5         |
| <b>Total</b>                                           |      |   |                               |      |            |      |      | <b>5,346.7</b> | <b>5238.4</b> | <b>50.0</b> | <b>49.0</b> |
| Identified signals                                     |      |   |                               |      |            |      |      | 5,225.1        | 48.8          | 48.8        | 47.0        |
| Unknown signals                                        |      |   |                               |      |            |      |      | 121.6          | 1.2           | 1.2         | 2.0         |
| Unknown % = 100*Unknown signals/Total detected signals |      |   |                               |      |            |      |      | 2.3            | 2.4           | 2.4         | 4.1         |

Table S13. ID8 pyrolysis liquid composition details, where the following information is given for each detected signal: (a) number of signal, (b) retention time, (c) window, (d) compound name, (e) quality match (below or equal and above 85 %), (f) integrated area, (g) area percentage, (h) normalised area to the internal standard, (i) calculated concentration in µg/mL (calculated as normalised area of the compound multiplied by the correction factor and by the response factor (RF)), (j) calculated concentration in µg/mL (calculated as normalised area of the compound without multiplying by the correction factor and multiplying it by the response factor (RF)), (k) concentration (using correction factor) in wt.% and (l) concentration (without using the correction factor) in wt.%.

| (a) | (b)      | (c) | (d)                      | (e)           | (f)         | (g)    | (h)        | (i)                 | (j)                | (k)               | (l)              |
|-----|----------|-----|--------------------------|---------------|-------------|--------|------------|---------------------|--------------------|-------------------|------------------|
| N°  | RT (min) | W   | Compound                 | Quality match | Area        | Area % | Norm. Area | [ ] with CF (µg/mL) | [ ] w/o CF (µg/mL) | [ ] with CF (wt%) | [ ] w/o CF (wt%) |
| 1   | 6.1      | 2   |                          | <85%          | 1,843,598   | 0.2    | 0.5        | 15.3                | 18.5               | 0.2               | 0.2              |
| 2   | 7.2      | 2   | 2-Propenenitrile         | ≥85%          | 2,213,996   | 0.3    | 0.6        | 18.3                | 22.2               | 0.2               | 0.2              |
| 3   | 7.4      | 2   |                          | <85%          | 2,448,131   | 0.3    | 0.7        | 20.2                | 24.6               | 0.2               | 0.2              |
|     | 8.1      | 2   | 1-Propanol (IS)          |               | 3,528,862   |        |            |                     |                    |                   |                  |
| 4   | 8.1      | 2   | Toluene                  | ≥85%          | 76,691,208  | 9.5    | 21.7       | 634.0               | 770.6              | 6.3               | 7.7              |
| 5   | 10.2     | 2   | Ethylbenzene             | ≥85%          | 120,174,992 | 14.9   | 34.1       | 993.5               | 1207.4             | 9.9               | 12.0             |
| 6   | 11.3     | 3   | Benzene, (1-methylethyl) | ≥85%          | 19,839,183  | 2.5    | 5.6        | 156.6               | 129.9              | 1.6               | 1.3              |
| 7   | 12.1     | 3   | Benzene, propyl          | ≥85%          | 3,673,991   | 0.5    | 1.0        | 29.0                | 24.1               | 0.3               | 0.2              |
| 8   | 13.2     | 3   | Styrene                  | ≥85%          | 302,380,723 | 37.4   | 85.6       | 2,386.3             | 1979.5             | 23.7              | 19.7             |

|                                                        |      |   |                           |      |            |      |      |                |               |             |             |
|--------------------------------------------------------|------|---|---------------------------|------|------------|------|------|----------------|---------------|-------------|-------------|
| 9                                                      | 14.7 | 3 | alfa, methylstyrene       | ≥85% | 85,150,944 | 10.5 | 24.1 | 670.4          | 556.2         | 6.7         | 5.5         |
| 10                                                     | 18.8 | 3 |                           | <85% | 2,809,216  | 0.3  | 0.8  | 22.2           | 18.4          | 0.2         | 0.2         |
| 11                                                     | 26.0 | 4 | Phenol, 2,6-Dimethyl      | ≥85% | 5,100,387  | 0.6  | 1.4  | 31.7           | 28.2          | 0.3         | 0.3         |
| 12                                                     | 28.0 | 4 | Phenol                    | ≥85% | 56,320,110 | 7.0  | 16.0 | 350.5          | 312.4         | 3.5         | 3.1         |
| 13                                                     | 29.4 | 5 | Phenol, 3-ethyl           | ≥85% | 5,382,401  | 0.7  | 1.5  | 12.7           | 21.6          | 0.1         | 0.2         |
| 14                                                     | 30.2 | 5 | Benzenebutanenitrile      | ≥85% | 25,738,959 | 3.2  | 7.3  | 61.1           | 103.8         | 0.6         | 1.0         |
| 15                                                     | 31.0 | 5 | Phenol, 3-ethyl           | <85% | 4,227,395  | 0.5  | 1.2  | 10.0           | 17.0          | 0.1         | 0.2         |
| 16                                                     | 31.6 | 5 | Phenol, 4-(1-methylethyl) | ≥85% | 31,753,300 | 3.9  | 9.0  | 75.3           | 127.9         | 0.7         | 1.3         |
| 17                                                     | 32.5 | 6 |                           | <85% | 48,588,303 | 6.0  | 13.8 | 74.0           | 151.1         | 0.7         | 1.5         |
| 18                                                     | 33.7 | 6 |                           | <85% | 6,728,896  | 0.8  | 1.9  | 10.2           | 20.9          | 0.1         | 0.2         |
| 19                                                     | 34.7 | 6 | p-Isopropenyl-phenol      | ≥85% | 8,467,213  | 1.0  | 2.4  | 12.9           | 26.3          | 0.1         | 0.3         |
| <b>Total</b>                                           |      |   |                           |      |            |      |      | <b>5,584.2</b> | <b>5560.7</b> | <b>55.6</b> | <b>55.3</b> |
| Identified signals                                     |      |   |                           |      |            |      |      | 5,442.3        | 5,327.1       | 54.1        | 53.0        |
| Unknown signals                                        |      |   |                           |      |            |      |      | 141.9          | 233.6         | 1.5         | 2.3         |
| Unknown % = 100*Unknown signals/Total detected signals |      |   |                           |      |            |      |      | 2.5            | 4.2           | 2.7         | 4.2         |

Table S14. ID9 pyrolysis liquid composition details, where the following information is given for each detected signal: (a) number of signal, (b) retention time, (c) window, (d) compound name, (e) quality match (below or equal and above 85 %), (f) integrated area, (g) area percentage, (h) normalised area to the internal standard, (i) calculated concentration in µg/mL (calculated as normalised area of the compound multiplied by the correction factor and by the response factor (RF)), (j) calculated concentration in µg/mL (calculated as normalised area of the compound without multiplying by the correction factor and multiplying it by the response factor (RF)), (k) concentration (using correction factor) in wt.% and (l) concentration (without using the correction factor) in wt.%.

| (a) | (b)         | (c) | (d)                           | (e)              | (f)         | (g)       | (h)           | (i)                    | (j)                   | (k)                  | (l)                 |
|-----|-------------|-----|-------------------------------|------------------|-------------|-----------|---------------|------------------------|-----------------------|----------------------|---------------------|
| N°  | RT<br>(min) | W   | Compound                      | Quality<br>match | Area        | Area<br>% | Norm.<br>Area | [ ] with CF<br>(µg/mL) | [ ] w/o CF<br>(µg/mL) | [ ] with CF<br>(wt%) | [ ] w/o CF<br>(wt%) |
| 1   | 6.1         | 2   |                               | <85%             | 2,317,491   | 0.3       | 0.7           | 20.7                   | 25.2                  | 0.2                  | 0.2                 |
| 2   | 7.2         | 2   | 2-Propenenitrile              | ≥85%             | 2,384,371   | 0.3       | 0.7           | 21.2                   | 25.8                  | 0.2                  | 0.2                 |
| 3   | 7.4         | 2   | 2-Butenoic acid, methyl ester | <85%             | 10,041,266  | 1.1       | 3.1           | 89.4                   | 108.6                 | 0.8                  | 1.0                 |
| 4   | 8.1         | 2   | Toluene                       | ≥85%             | 76,002,450  | 8.5       | 23.2          | 676.2                  | 821.8                 | 6.0                  | 7.3                 |
|     | 8.2         | 2   | 1-Propanol (IS)               |                  | 3,283,756   |           |               |                        |                       |                      |                     |
| 5   | 10.2        | 3   | Ethylbenzene                  | ≥85%             | 116,484,879 | 13.0      | 35.5          | 989.1                  | 820.5                 | 8.8                  | 7.3                 |
| 6   | 11.3        | 3   | Benzene, (1-methylethyl)      | ≥85%             | 16,550,032  | 1.8       | 5.0           | 140.5                  | 116.6                 | 1.2                  | 1.0                 |
| 7   | 12.1        | 3   | Benzene, propyl               | ≥85%             | 5,821,372   | 0.7       | 1.8           | 49.4                   | 41.0                  | 0.4                  | 0.4                 |
| 8   | 13.2        | 3   | Styrene                       | ≥85%             | 406,643,837 | 45.4      | 123.9         | 3,451.9                | 2,863.5               | 30.5                 | 25.3                |

|                                                        |      |   |                           |      |             |      |      |                |                |             |             |
|--------------------------------------------------------|------|---|---------------------------|------|-------------|------|------|----------------|----------------|-------------|-------------|
| 9                                                      | 14.7 | 3 | alfa, methylstyrene       | ≥85% | 100,120,681 | 11.2 | 30.5 | 848.5          | 703.9          | 7.5         | 6.2         |
| 10                                                     | 18.8 | 3 |                           | <85% | 3,122,667   | 0.3  | 1.0  | 26.5           | 22.0           | 0.2         | 0.2         |
| 11                                                     | 26.0 | 4 | Phenol, 2,6-Dimethyl      | ≥85% | 3,375,487   | 0.4  | 1.0  | 22.7           | 20.2           | 0.2         | 0.2         |
| 12                                                     | 28.0 | 4 | Phenol                    | ≥85% | 97,781,765  | 10.9 | 29.8 | 653.9          | 582.8          | 5.8         | 5.2         |
| 13                                                     | 29.4 | 5 | Phenol, 3-ethyl           | ≥85% | 3,763,864   | 0.4  | 1.1  | 9.6            | 16.3           | 0.1         | 0.1         |
| 14                                                     | 30.2 | 5 | Benzenebutanenitrile      | ≥85% | 10,149,044  | 1.1  | 3.1  | 25.9           | 43.9           | 0.2         | 0.4         |
| 15                                                     | 31.0 | 5 |                           | <85% | 2,017,782   | 0.2  | 0.6  | 5.2            | 8.8            | 0.0         | 0.1         |
| 16                                                     | 31.6 | 5 | Phenol, 4-(1-methylethyl) | ≥85% | 25,399,243  | 2.8  | 7.7  | 64.8           | 110.1          | 0.6         | 1.0         |
| 17                                                     | 32.5 | 6 |                           | <85% | 10,616,285  | 1.2  | 3.2  | 17.5           | 35.6           | 0.2         | 0.3         |
| 18                                                     | 40.4 | 6 |                           | <85% | 3,143,875   | 0.3  | 0.9  | 4.9            | 9.9            | 0.0         | 0.1         |
| <b>Total</b>                                           |      |   |                           |      |             |      |      | <b>7,117.9</b> | <b>6,376.6</b> | <b>63.0</b> | <b>56.4</b> |
| Identified signals                                     |      |   |                           |      |             |      |      | 7,043.1        | 6,275.0        | 62.3        | 55.6        |
| Unknown signals                                        |      |   |                           |      |             |      |      | 74.8           | 101.6          | 0.7         | 0.8         |
| Unknown % = 100*Unknown signals/Total detected signals |      |   |                           |      |             |      |      | 1.1            | 1.6            | 1.1         | 1.4         |



Table S15. ID10 pyrolysis liquid composition details, where the following information is given for each detected signal: (a) number of signal, (b) retention time, (c) window, (d) compound name, (e) quality match (below or equal and above 85 %), (f) integrated area, (g) area percentage, (h) normalised area to the internal standard, (i) calculated concentration in µg/mL (calculated as normalised area of the compound multiplied by the correction factor and by the response factor (RF)), (j) calculated concentration in µg/mL (calculated as normalised area of the compound without multiplying by the correction factor and multiplying it by the response factor (RF)), (k) concentration (using correction factor) in wt.% and (l) concentration (without using the correction factor) in wt.%.

| (a) | (b)      | (c) | (d)                      | (e)           | (f)         | (g)    | (h)        | (i)                 | (j)                | (k)               | (l)              |
|-----|----------|-----|--------------------------|---------------|-------------|--------|------------|---------------------|--------------------|-------------------|------------------|
| N°  | RT (min) | W   | Compound                 | Quality match | Area        | Area % | Norm. Area | [ ] with CF (µg/mL) | [ ] w/o CF (µg/mL) | [ ] with CF (wt%) | [ ] w/o CF (wt%) |
| 1   | 6.1      | 2   |                          | <85%          | 2,801,055   | 0.3    | 0.8        | 22.9                | 27.8               | 0.2               | 0.3              |
| 2   | 7.2      | 2   | 2-Propenenitrile         | ≥85%          | 2,293,246   | 0.2    | 0.6        | 18.8                | 22.9               | 0.2               | 0.2              |
| 3   | 7.4      | 2   |                          | <85%          | 8,528,443   | 0.9    | 2.4        | 70.9                | 86.2               | 0.7               | 0.8              |
|     | 8.1      | 2   | 1-Propanol (IS)          |               | 3,549,498   |        |            |                     |                    |                   |                  |
| 4   | 8.1      | 2   | Toluene                  | ≥85%          | 70,358,963  | 7.2    | 20.1       | 586.4               | 712.6              | 5.4               | 6.6              |
| 5   | 10.2     | 2   | Ethylbenzene             | ≥85%          | 106,459,690 | 10.8   | 30.3       | 884.1               | 1,074.5            | 8.1               | 9.9              |
| 6   | 11.3     | 3   | Benzene, (1-methylethyl) | ≥85%          | 14,484,825  | 1.5    | 4.2        | 115.8               | 96.0               | 1.1               | 0.9              |
| 7   | 12.1     | 3   | Benzene, propyl          | ≥85%          | 4,790,180   | 0.5    | 1.3        | 36.9                | 30.6               | 0.3               | 0.3              |

|                    |      |   |                                           |      |             |      |       |                |                |             |             |
|--------------------|------|---|-------------------------------------------|------|-------------|------|-------|----------------|----------------|-------------|-------------|
| 8                  | 13.2 | 3 | Styrene                                   | ≥85% | 397,681,202 | 40.2 | 112.9 | 3,144.5        | 2,608.5        | 28.9        | 24.0        |
| 9                  | 14.7 | 3 | alfa, methylstyrene                       | ≥85% | 89,961,386  | 9.2  | 25.7  | 716.7          | 594.6          | 6.6         | 5.5         |
| 10                 | 18.8 | 3 |                                           | <85% | 3,652,361   | 0.4  | 1.0   | 28.2           | 23.4           | 0.3         | 0.2         |
| 11                 | 25.8 | 4 | Naphthalene, 1-methyl                     | ≥85% | 1,610,962   | 0.2  | 0.4   | 9.8            | 8.7            | 0.1         | 0.1         |
| 12                 | 25.9 | 4 | Phenol, 2,6-Dimethyl                      | ≥85% | 4,971,198   | 0.5  | 1.4   | 31.2           | 27.8           | 0.3         | 0.3         |
| 13                 | 27.9 | 4 | Phenol                                    | ≥85% | 115,989,166 | 11.7 | 32.9  | 723.5          | 644.9          | 6.7         | 5.9         |
| 14                 | 29.4 | 5 | Phenol, 3-ethyl                           | ≥85% | 6,149,956   | 0.6  | 1.8   | 14.8           | 25.2           | 0.1         | 0.2         |
| 15                 | 30.1 | 5 | Benzenebutanenitrile                      | ≥85% | 30,906,841  | 3.1  | 8.7   | 73.0           | 124.1          | 0.7         | 1.1         |
| 16                 | 31.5 | 5 | Phenol, 4-(1-methylethyl)                 | ≥85% | 61,134,800  | 6.2  | 17.5  | 146.8          | 249.5          | 1.4         | 2.3         |
| 17                 | 32.2 | 6 |                                           | <85% | 30,144,785  | 3.0  | 8.4   | 45.4           | 92.7           | 0.4         | 0.9         |
| 18                 | 32.5 | 6 | Phenol, p-tert-butyl                      | ≥85% | 18,597,840  | 2.0  | 5.7   | 30.6           | 62.4           | 0.3         | 0.6         |
| 19                 | 33.7 | 6 |                                           | <85% | 7,421,885   | 0.7  | 2.1   | 11.1           | 22.7           | 0.1         | 0.2         |
| 20                 | 34.3 | 6 | Naphthalene, 1,2,3,4, tetrahydro-1-phneyl | ≥85% | 2,574,562   | 0.3  | 0.7   | 3.9            | 7.9            | 0.0         | 0.1         |
| 21                 | 34.7 | 6 |                                           | <85% | 5,362,015   | 0.5  | 1.5   | 8.0            | 16.2           | 0.1         | 0.1         |
| <b>Total</b>       |      |   |                                           |      |             |      |       | <b>6,723.4</b> | <b>6,559.3</b> | <b>61.9</b> | <b>60.3</b> |
| Identified signals |      |   |                                           |      |             |      |       | 6,536.8        | 6,290.2        | 60.2        | 58.0        |
| Unknown signals    |      |   |                                           |      |             |      |       | 186.6          | 269.1          | 1.7         | 2.3         |

|                                                        |     |     |     |     |
|--------------------------------------------------------|-----|-----|-----|-----|
| Unknown % = 100*Unknown signals/Total detected signals | 2.8 | 4.1 | 2.7 | 3.8 |
|--------------------------------------------------------|-----|-----|-----|-----|

Table S16. “FRP (X10)” (ID1 concentrated) pyrolysis liquid composition details, where the following information is given for each detected signal: (a) number of signal, (b) retention time, (c) window, (d) compound name, (e) quality match (below or equal and above 85 %), (f) integrated area, (g) area percentage, (h) normalised area to the internal standard, (i) calculated concentration in µg/mL (calculated as normalised area of the compound multiplied by the correction factor and by the response factor (RF)), (j) calculated concentration in µg/mL (calculated as normalised area of the compound without multiplying by the correction factor and multiplying it by the response factor (RF)), (k) concentration (using correction factor) in wt.% and (l) concentration (without using the correction factor) in wt.%.

| (a) | (b)      | (c) | (d)      | (e)           | (f)       | (g)    | (h)        | (i)                 | (j)                | (k)               | (l)              |
|-----|----------|-----|----------|---------------|-----------|--------|------------|---------------------|--------------------|-------------------|------------------|
| N°  | RT (min) | W   | Compound | Quality match | Area      | Area % | Norm. Area | [ ] with CF (µg/mL) | [ ] w/o CF (µg/mL) | [ ] with CF (wt%) | [ ] w/o CF (wt%) |
| 1   | 3.5      | 1   |          | <85%          | 3,040,998 | 0.0    | 0.2        | 10.4                | 8.5                | 0.0               | 0.0              |
| 2   | 3.6      | 1   |          | <85%          | 168,016   | 0.0    | 0.0        | 0.6                 | 0.5                | 0.0               | 0.0              |
| 3   | 3.8      | 1   |          | <85%          | 368,688   | 0.0    | 0.0        | 1.3                 | 1.0                | 0.0               | 0.0              |
| 4   | 3.8      | 1   |          | <85%          | 3,951,350 | 0.1    | 0.3        | 13.5                | 11.0               | 0.0               | 0.0              |
| 5   | 4.0      | 1   |          | <85%          | 1,577,010 | 0.0    | 0.1        | 5.4                 | 4.4                | 0.0               | 0.0              |

|    |     |   |                                  |      |             |     |      |       |       |     |     |
|----|-----|---|----------------------------------|------|-------------|-----|------|-------|-------|-----|-----|
| 6  | 4.2 | 1 | Propanal                         | ≥85% | 64,082,477  | 1.0 | 4.1  | 218.9 | 178.5 | 0.2 | 0.2 |
| 7  | 4.4 | 1 | Acetone                          | ≥85% | 29,668,938  | 0.5 | 1.9  | 101.4 | 82.6  | 0.1 | 0.1 |
| 8  | 6.0 | 2 | Benzene                          | ≥85% | 92,035,997  | 1.5 | 5.9  | 173.1 | 210.4 | 0.2 | 0.2 |
| 9  | 6.2 | 2 |                                  | <85% | 1,903,021   | 0.0 | 0.1  | 3.6   | 4.4   | 0.0 | 0.0 |
| 10 | 6.3 | 2 |                                  | <85% | 8,951,859   | 0.1 | 0.6  | 16.8  | 20.5  | 0.0 | 0.0 |
| 11 | 6.6 | 2 |                                  | <85% | 709,945     | 0.0 | 0.0  | 1.3   | 1.6   | 0.0 | 0.0 |
| 12 | 6.7 | 2 |                                  | <85% | 565,371     | 0.0 | 0.0  | 1.1   | 1.3   | 0.0 | 0.0 |
| 13 | 6.8 | 2 |                                  | <85% | 675,219     | 0.0 | 0.0  | 1.3   | 1.5   | 0.0 | 0.0 |
| 14 | 7.3 | 2 |                                  | <85% | 3,198,673   | 0.1 | 0.2  | 6.0   | 7.3   | 0.0 | 0.0 |
| 15 | 7.7 | 2 | 1,3-Dioxolane, 2-ethyl-4-methyl- | ≥85% | 202,513,167 | 3.3 | 13.1 | 380.9 | 462.9 | 0.4 | 0.5 |
| 16 | 7.9 | 2 |                                  | <85% | 5,374,761   | 0.1 | 0.3  | 10.1  | 12.3  | 0.0 | 0.0 |
| 17 | 8.1 | 2 | Toluene                          | ≥85% | 126,337,743 | 2.0 | 8.1  | 237.6 | 288.8 | 0.2 | 0.3 |
|    | 8.1 |   | 1-Propanol (IS)                  | ≥85% | 15,510,695  |     |      |       |       |     |     |
| 18 | 8.5 | 2 |                                  | <85% | 5,516,760   | 0.1 | 0.4  | 10.4  | 12.6  | 0.0 | 0.0 |
| 19 | 8.6 | 2 |                                  | <85% | 26,655,970  | 0.4 | 9.9  | 290.0 | 352.4 | 0.3 | 0.4 |
| 20 | 8.8 | 2 |                                  | <85% | 850,132     | 0.0 | 0.3  | 9.2   | 11.2  | 0.0 | 0.0 |
| 21 | 8.9 | 2 |                                  | <85% | 419,262     | 0.0 | 0.2  | 4.6   | 5.5   | 0.0 | 0.0 |
| 22 | 9.3 | 2 |                                  | <85% | 2,507,041   | 0.0 | 0.9  | 27.3  | 33.1  | 0.0 | 0.0 |

|    |      |   |                           |      |               |      |       |          |          |      |      |
|----|------|---|---------------------------|------|---------------|------|-------|----------|----------|------|------|
| 23 | 9.5  | 2 |                           | <85% | 1,705,354     | 0.0  | 0.6   | 18.6     | 22.5     | 0.0  | 0.0  |
| 24 | 9.6  | 2 |                           | <85% | 547,023       | 0.0  | 0.2   | 6.0      | 7.2      | 0.0  | 0.0  |
| 25 | 9.8  | 2 | 2-Propen-1-ol             | ≥85% | 49,782,475    | 0.8  | 18.6  | 541.6    | 658.2    | 0.5  | 0.7  |
| 26 | 10.1 | 2 | Ethylbenzene              | ≥85% | 431,727,844   | 6.9  | 161.0 | 4,696.9  | 5,708.3  | 4.7  | 5.7  |
| 27 | 10.4 | 2 | p-xylene                  | ≥85% | 6,156,755     | 0.1  | 2.3   | 67.0     | 81.4     | 0.1  | 0.1  |
| 28 | 10.5 | 2 | o-xylene                  | ≥85% | 14,761,427    | 0.2  | 5.5   | 160.6    | 195.2    | 0.2  | 0.2  |
| 29 | 11.0 | 3 |                           | <85% | 1,602,517     | 0.0  | 0.6   | 16.7     | 13.8     | 0.0  | 0.0  |
| 30 | 11.2 | 3 | Benzene, (1-methylethyl)- | ≥85% | 66,122,103    | 1.1  | 24.7  | 687.1    | 570.0    | 0.7  | 0.6  |
| 31 | 11.3 | 3 |                           | <85% | 3,111,321     | 0.1  | 1.2   | 32.3     | 26.8     | 0.0  | 0.0  |
| 32 | 11.5 | 3 |                           | <85% | 20,824,010    | 0.3  | 7.8   | 216.4    | 179.5    | 0.2  | 0.2  |
| 33 | 12.0 | 3 | Benzene, propyl-          | ≥85% | 12,382,125    | 0.2  | 4.6   | 128.7    | 106.7    | 0.1  | 0.1  |
| 34 | 12.3 | 3 |                           | <85% | 2,535,385     | 0.0  | 0.9   | 26.3     | 21.9     | 0.0  | 0.0  |
| 35 | 12.7 | 3 |                           | <85% | 13,848,852    | 0.2  | 5.2   | 143.9    | 119.4    | 0.1  | 0.1  |
| 36 | 13.1 | 3 | Styrene                   | ≥85% | 1,388,393,613 | 22.3 | 517.8 | 14,426.8 | 11,967.6 | 14.4 | 11.9 |
| 37 | 13.6 | 3 |                           | <85% | 2,835,714     | 0.0  | 1.1   | 29.5     | 24.4     | 0.0  | 0.0  |
| 38 | 14.2 | 3 |                           | <85% | 9,301,194     | 0.1  | 3.5   | 96.6     | 80.2     | 0.1  | 0.1  |
| 39 | 14.6 | 3 | .alpha.-methylstyrene     | ≥85% | 352,984,335   | 5.7  | 131.6 | 3,667.9  | 3,042.6  | 3.7  | 3.0  |
| 40 | 15.2 | 3 |                           | <85% | 22,118,857    | 0.4  | 8.2   | 229.8    | 190.7    | 0.2  | 0.2  |

|    |      |   |                     |      |            |     |     |       |       |     |     |
|----|------|---|---------------------|------|------------|-----|-----|-------|-------|-----|-----|
| 41 | 15.6 | 3 |                     | <85% | 3,891,507  | 0.1 | 1.5 | 40.4  | 33.5  | 0.0 | 0.0 |
| 42 | 15.8 | 3 |                     | <85% | 12,278,629 | 0.2 | 4.6 | 127.6 | 105.8 | 0.1 | 0.1 |
| 43 | 16.1 | 3 |                     | <85% | 14,838,606 | 0.2 | 5.5 | 154.2 | 127.9 | 0.2 | 0.1 |
| 44 | 16.3 | 3 |                     | <85% | 3,570,496  | 0.1 | 1.3 | 37.1  | 30.8  | 0.0 | 0.0 |
| 45 | 16.5 | 3 |                     | <85% | 1,836,045  | 0.0 | 0.7 | 19.1  | 15.8  | 0.0 | 0.0 |
| 46 | 16.8 | 3 |                     | <85% | 2,459,213  | 0.0 | 0.9 | 25.6  | 21.2  | 0.0 | 0.0 |
| 47 | 17.0 | 3 |                     | <85% | 2,799,339  | 0.0 | 1.0 | 29.1  | 24.1  | 0.0 | 0.0 |
| 48 | 17.2 | 3 |                     | <85% | 1,863,278  | 0.0 | 0.7 | 19.4  | 16.1  | 0.0 | 0.0 |
| 49 | 17.3 | 3 |                     | <85% | 3,373,026  | 0.1 | 1.3 | 35.0  | 29.1  | 0.0 | 0.0 |
| 50 | 17.5 | 3 |                     | <85% | 3,541,107  | 0.1 | 1.3 | 36.8  | 30.5  | 0.0 | 0.0 |
| 51 | 17.6 | 3 | Benzene, 2-butenyl- | ≥85% | 6,596,009  | 0.1 | 2.5 | 68.5  | 56.9  | 0.1 | 0.1 |
| 52 | 18.2 | 3 | Benzaldehyde        | ≥85% | 16,437,592 | 0.3 | 6.1 | 170.8 | 141.7 | 0.2 | 0.1 |
| 53 | 18.4 | 3 |                     | <85% | 5,597,066  | 0.1 | 2.1 | 58.2  | 48.2  | 0.1 | 0.0 |
| 54 | 18.6 | 3 |                     | <85% | 2,459,551  | 0.0 | 0.9 | 25.6  | 21.2  | 0.0 | 0.0 |
| 55 | 18.8 | 3 |                     | <85% | 3,851,419  | 0.1 | 1.4 | 40.0  | 33.2  | 0.0 | 0.0 |
| 56 | 19.1 | 3 |                     | <85% | 734,589    | 0.0 | 0.3 | 7.6   | 6.3   | 0.0 | 0.0 |
| 57 | 19.1 | 3 |                     | <85% | 4,158,362  | 0.1 | 1.6 | 43.2  | 35.8  | 0.0 | 0.0 |
| 58 | 19.3 | 3 | Benzene, 1-hexynyl- | ≥85% | 12,532,929 | 0.2 | 4.7 | 130.2 | 108.0 | 0.1 | 0.1 |

|    |      |   |                                |      |            |     |      |       |       |     |     |
|----|------|---|--------------------------------|------|------------|-----|------|-------|-------|-----|-----|
| 59 | 19.5 | 3 |                                | <85% | 3,533,982  | 0.1 | 1.3  | 36.7  | 30.5  | 0.0 | 0.0 |
| 60 | 19.6 | 3 |                                | <85% | 1,649,965  | 0.0 | 0.6  | 17.1  | 14.2  | 0.0 | 0.0 |
| 61 | 19.8 | 3 |                                | <85% | 2,378,780  | 0.0 | 0.9  | 24.7  | 20.5  | 0.0 | 0.0 |
| 62 | 19.9 | 3 |                                | <85% | 1,294,368  | 0.0 | 0.5  | 13.4  | 11.2  | 0.0 | 0.0 |
| 63 | 20.0 | 3 |                                | <85% | 1,638,549  | 0.0 | 0.6  | 17.0  | 14.1  | 0.0 | 0.0 |
| 64 | 20.2 | 3 |                                | <85% | 2,908,573  | 0.0 | 1.1  | 30.2  | 25.1  | 0.0 | 0.0 |
| 65 | 20.3 | 3 | Acetophenone                   | ≥85% | 18,589,722 | 0.3 | 6.9  | 193.2 | 160.2 | 0.2 | 0.2 |
| 66 | 20.5 | 3 | Benzoic acid, ethyl ester      | ≥85% | 8,572,090  | 0.1 | 3.2  | 89.1  | 73.9  | 0.1 | 0.1 |
| 67 | 20.9 | 3 |                                | <85% | 1,269,954  | 0.0 | 0.5  | 13.2  | 10.9  | 0.0 | 0.0 |
| 68 | 21.7 | 4 |                                | <85% | 4,339,398  | 0.1 | 1.6  | 35.5  | 31.7  | 0.0 | 0.0 |
| 69 | 22.1 | 4 | Naphthalene                    | ≥85% | 10,943,448 | 0.2 | 4.1  | 89.6  | 79.9  | 0.1 | 0.1 |
| 70 | 22.3 | 4 | n-Propyl benzoate              | ≥85% | 11,469,597 | 0.2 | 4.3  | 94.0  | 83.7  | 0.1 | 0.1 |
| 71 | 23.0 | 4 |                                | <85% | 1,901,601  | 0.0 | 0.7  | 15.6  | 13.9  | 0.0 | 0.0 |
| 72 | 23.1 | 4 |                                | <85% | 17,994,581 | 0.3 | 6.7  | 147.4 | 131.4 | 0.1 | 0.1 |
| 73 | 23.7 | 4 | Benzoic acid, 2-propenyl ester | ≥85% | 99,240,541 | 1.6 | 37.0 | 812.9 | 724.5 | 0.8 | 0.7 |
| 74 | 24.0 | 4 |                                | <85% | 14,278,664 | 0.2 | 5.3  | 117.0 | 104.2 | 0.1 | 0.1 |
| 75 | 24.8 | 4 |                                | <85% | 9,555,120  | 0.2 | 3.6  | 78.3  | 69.8  | 0.1 | 0.1 |
| 76 | 25.0 | 4 |                                | <85% | 1,287,025  | 0.0 | 0.5  | 10.5  | 9.4   | 0.0 | 0.0 |

|    |      |   |                                            |      |            |     |     |       |       |     |     |
|----|------|---|--------------------------------------------|------|------------|-----|-----|-------|-------|-----|-----|
| 77 | 25.3 | 4 |                                            | <85% | 3,755,353  | 0.1 | 1.4 | 30.8  | 27.4  | 0.0 | 0.0 |
| 78 | 25.6 | 4 | Benzocycloheptatriene                      | ≥85% | 10,934,580 | 0.2 | 4.1 | 89.6  | 79.8  | 0.1 | 0.1 |
| 79 | 26.1 | 4 | N-(2-Fluoro-benzyl)-2,2-diphenyl-acetamide | ≥85% | 1,914,092  | 0.0 | 0.7 | 15.7  | 14.0  | 0.0 | 0.0 |
| 80 | 26.3 | 4 |                                            | <85% | 887,865    | 0.0 | 0.3 | 7.3   | 6.5   | 0.0 | 0.0 |
| 81 | 26.5 | 4 |                                            | <85% | 7,751,282  | 0.1 | 2.9 | 63.5  | 56.6  | 0.1 | 0.1 |
| 82 | 26.8 | 4 |                                            | <85% | 797,068    | 0.0 | 0.3 | 6.5   | 5.8   | 0.0 | 0.0 |
| 83 | 27.1 | 4 |                                            | <85% | 3,126,701  | 0.1 | 1.2 | 25.6  | 22.8  | 0.0 | 0.0 |
| 84 | 27.3 | 4 |                                            | <85% | 2,091,058  | 0.0 | 0.8 | 17.1  | 15.3  | 0.0 | 0.0 |
| 85 | 27.6 | 4 | Biphenyl                                   | ≥85% | 19,961,212 | 0.3 | 7.4 | 163.5 | 145.7 | 0.2 | 0.1 |
| 86 | 27.8 | 4 | Phenol                                     | ≥85% | 7,945,235  | 0.1 | 3.0 | 65.1  | 58.0  | 0.1 | 0.1 |
| 87 | 28.0 | 4 |                                            | <85% | 23,337,368 | 0.4 | 8.7 | 191.2 | 170.4 | 0.2 | 0.2 |
| 88 | 28.2 | 4 | Diphenylmethane                            | ≥85% | 542,919    | 0.0 | 0.2 | 4.4   | 4.0   | 0.0 | 0.0 |
| 89 | 28.3 | 4 |                                            | <85% | 3,220,576  | 0.1 | 1.2 | 26.4  | 23.5  | 0.0 | 0.0 |
| 90 | 28.3 | 4 | 1H-Inden-1-one, 2,3-dihydro-               | ≥85% | 1,628,970  | 0.0 | 0.6 | 13.3  | 11.9  | 0.0 | 0.0 |
| 91 | 28.4 | 4 |                                            | <85% | 821,533    | 0.0 | 0.3 | 6.7   | 6.0   | 0.0 | 0.0 |
| 92 | 28.5 | 4 |                                            | <85% | 515,378    | 0.0 | 0.2 | 4.2   | 3.8   | 0.0 | 0.0 |
| 93 | 28.6 | 4 |                                            | <85% | 4,457,010  | 0.1 | 1.7 | 36.5  | 32.5  | 0.0 | 0.0 |



|     |      |   |                          |      |            |     |     |      |      |     |     |
|-----|------|---|--------------------------|------|------------|-----|-----|------|------|-----|-----|
| 94  | 28.7 | 4 |                          | <85% | 656,015    | 0.0 | 0.2 | 5.4  | 4.8  | 0.0 | 0.0 |
| 95  | 28.9 | 4 |                          | <85% | 639,095    | 0.0 | 0.2 | 5.2  | 4.7  | 0.0 | 0.0 |
| 96  | 29.0 | 4 |                          | <85% | 829,525    | 0.0 | 0.3 | 6.8  | 6.1  | 0.0 | 0.0 |
| 97  | 29.3 | 5 |                          | <85% | 4,519,380  | 0.1 | 1.7 | 14.1 | 24.0 | 0.0 | 0.0 |
| 98  | 29.4 | 5 |                          | <85% | 4,597,562  | 0.1 | 1.7 | 14.4 | 24.4 | 0.0 | 0.0 |
| 99  | 29.5 | 5 |                          | <85% | 1,846,601  | 0.0 | 0.7 | 5.8  | 9.8  | 0.0 | 0.0 |
| 100 | 29.5 | 5 | 1,1'-Biphenyl, 4-methyl- | ≥85% | 10,147,854 | 0.2 | 3.8 | 31.7 | 53.9 | 0.0 | 0.1 |
| 101 | 29.6 | 5 |                          | <85% | 13,505,446 | 0.2 | 5.0 | 42.2 | 71.7 | 0.0 | 0.1 |
| 102 | 29.7 | 5 |                          | <85% | 3,490,617  | 0.1 | 1.3 | 10.9 | 18.5 | 0.0 | 0.0 |
| 103 | 29.8 | 5 |                          | <85% | 9,243,567  | 0.1 | 3.4 | 28.9 | 49.1 | 0.0 | 0.0 |
| 104 | 30.1 | 5 |                          | <85% | 1,460,703  | 0.0 | 0.5 | 4.6  | 7.8  | 0.0 | 0.0 |
| 105 | 30.1 | 5 |                          | <85% | 1,867,527  | 0.0 | 0.7 | 5.8  | 9.9  | 0.0 | 0.0 |
| 106 | 30.3 | 5 |                          | <85% | 12,235,050 | 0.2 | 4.6 | 38.2 | 64.9 | 0.0 | 0.1 |
| 107 | 30.5 | 5 | Benzenebutanol           | ≥85% | 4,243,051  | 0.1 | 1.6 | 13.2 | 22.5 | 0.0 | 0.0 |
| 108 | 30.6 | 5 |                          | <85% | 1,456,722  | 0.0 | 0.5 | 4.5  | 7.7  | 0.0 | 0.0 |
| 109 | 30.7 | 5 | 1,1'-Biphenyl, 2-ethyl-  | ≥85% | 3,349,487  | 0.1 | 1.2 | 10.5 | 17.8 | 0.0 | 0.0 |
| 110 | 30.8 | 5 |                          | <85% | 1,368,643  | 0.0 | 0.5 | 4.3  | 7.3  | 0.0 | 0.0 |
| 111 | 30.9 | 5 |                          | <85% | 2,371,011  | 0.0 | 0.9 | 7.4  | 12.6 | 0.0 | 0.0 |

|     |      |   |                                                 |      |             |     |       |         |         |     |     |
|-----|------|---|-------------------------------------------------|------|-------------|-----|-------|---------|---------|-----|-----|
| 112 | 31.2 | 5 | 4,4'-Dimethylbiphenyl                           | ≥85% | 4,829,339   | 0.1 | 1.8   | 15.1    | 25.6    | 0.0 | 0.0 |
| 113 | 31.3 | 5 | 4-Ethylbiphenyl                                 | ≥85% | 1,532,606   | 0.0 | 0.6   | 4.8     | 8.1     | 0.0 | 0.0 |
| 114 | 31.4 | 5 |                                                 | <85% | 1,840,230   | 0.0 | 0.7   | 5.7     | 9.8     | 0.0 | 0.0 |
| 115 | 31.4 | 5 |                                                 | <85% | 1,843,988   | 0.0 | 0.7   | 5.8     | 9.8     | 0.0 | 0.0 |
| 116 | 31.8 | 5 | Benzene, 1,1'-(1-methyl-1,3-propanediyl)bis-    | ≥85% | 29,035,647  | 0.5 | 10.8  | 90.7    | 154.1   | 0.1 | 0.2 |
| 117 | 31.9 | 5 | Benzene, 1,1'-(1,3-propanediyl)bis-             | ≥85% | 477,002,654 | 7.7 | 177.9 | 1,489.5 | 2,531.7 | 1.5 | 2.5 |
| 118 | 32.0 | 5 | Benzene, 1,1'-(3-methyl-1-propene-1,3-diyl)bis- | ≥85% | 27,292,923  | 0.4 | 10.2  | 85.2    | 144.9   | 0.1 | 0.1 |
| 119 | 32.2 | 5 |                                                 | <85% | 6,141,664   | 0.1 | 2.3   | 19.2    | 32.6    | 0.0 | 0.0 |
| 120 | 32.4 | 5 |                                                 | <85% | 7,093,310   | 0.1 | 2.6   | 22.1    | 37.6    | 0.0 | 0.0 |
| 121 | 32.5 | 5 | 2-Propenoic acid, 3-phenyl-, 2-propenyl ester   | ≥85% | 8,673,745   | 0.1 | 3.2   | 27.1    | 46.0    | 0.0 | 0.0 |
| 122 | 32.7 | 5 |                                                 | <85% | 10,305,698  | 0.2 | 3.8   | 32.2    | 54.7    | 0.0 | 0.1 |
| 123 | 32.8 | 5 |                                                 | <85% | 14,067,323  | 0.2 | 5.2   | 43.9    | 74.7    | 0.0 | 0.1 |
| 124 | 32.9 | 5 |                                                 | <85% | 2,175,434   | 0.0 | 0.8   | 6.8     | 11.5    | 0.0 | 0.0 |
| 125 | 33.0 | 5 | Bicyclo[4.2.1]nona-2,4,7-triene, 7-phenyl-      | ≥85% | 31,091,361  | 0.5 | 11.6  | 97.1    | 165.0   | 0.1 | 0.2 |
| 126 | 33.1 | 5 |                                                 | <85% | 1,424,850   | 0.0 | 0.5   | 4.4     | 7.6     | 0.0 | 0.0 |

|     |      |   |                          |      |             |     |       |         |         |     |     |
|-----|------|---|--------------------------|------|-------------|-----|-------|---------|---------|-----|-----|
| 127 | 33.2 | 5 | 2'-Ethylpropiophenone    | ≥85% | 7,861,501   | 0.1 | 2.9   | 24.5    | 41.7    | 0.0 | 0.0 |
| 128 | 33.4 | 5 | Fluorene                 | ≥85% | 8,686,908   | 0.1 | 3.2   | 27.1    | 46.1    | 0.0 | 0.0 |
| 129 | 33.5 | 5 |                          | <85% | 80,105,372  | 1.3 | 29.9  | 250.1   | 425.2   | 0.2 | 0.4 |
| 130 | 33.6 | 5 |                          | <85% | 4,303,743   | 0.1 | 1.6   | 13.4    | 22.8    | 0.0 | 0.0 |
| 131 | 33.6 | 5 | 1(3H)-Isobenzofuranone   | ≥85% | 6,029,512   | 0.1 | 2.2   | 18.8    | 32.0    | 0.0 | 0.0 |
| 132 | 33.8 | 5 | 2H-1-Benzopyran-2-one    | ≥85% | 7,570,930   | 0.1 | 2.8   | 23.6    | 40.2    | 0.0 | 0.0 |
| 133 | 33.9 | 5 |                          | <85% | 8,637,174   | 0.1 | 3.2   | 27.0    | 45.8    | 0.0 | 0.0 |
| 134 | 34.0 | 5 | .alpha.-methylstilbene   | ≥85% | 2,106,854   | 0.0 | 0.8   | 6.6     | 11.2    | 0.0 | 0.0 |
| 135 | 34.1 | 5 |                          | <85% | 2,310,992   | 0.0 | 0.9   | 7.2     | 12.3    | 0.0 | 0.0 |
| 136 | 34.1 | 5 |                          | <85% | 8,774,851   | 0.1 | 3.3   | 27.4    | 46.6    | 0.0 | 0.0 |
| 137 | 34.2 | 5 |                          | <85% | 89,818,389  | 1.4 | 33.5  | 280.5   | 476.7   | 0.3 | 0.5 |
| 138 | 34.3 | 5 | Benzoic acid             | ≥85% | 509,245,198 | 8.2 | 189.9 | 1,590.1 | 2,702.8 | 1.6 | 2.7 |
| 139 | 34.5 | 5 | Benzoic acid             | ≥85% | 16,082,581  | 0.3 | 6.0   | 50.2    | 85.4    | 0.1 | 0.1 |
| 140 | 34.7 | 5 |                          | <85% | 50,305,836  | 0.8 | 18.8  | 157.1   | 267.0   | 0.2 | 0.3 |
| 141 | 34.8 | 5 | 1,2-Diphenylcyclopropane | ≥85% | 228,396,778 | 3.7 | 85.2  | 713.2   | 1,212.2 | 0.7 | 1.2 |
| 142 | 35.0 | 6 | Benzophenone             | ≥85% | 11,526,369  | 0.2 | 4.3   | 23.1    | 47.2    | 0.0 | 0.0 |
| 143 | 35.1 | 6 |                          | <85% | 47,667,158  | 0.8 | 17.8  | 95.7    | 195.3   | 0.1 | 0.2 |
| 144 | 35.3 | 6 | (E)-Stilbene             | ≥85% | 18,221,466  | 0.3 | 6.8   | 36.6    | 74.6    | 0.0 | 0.1 |

|     |      |   |                                                         |      |             |     |       |       |         |     |     |
|-----|------|---|---------------------------------------------------------|------|-------------|-----|-------|-------|---------|-----|-----|
| 145 | 35.4 | 6 | 1,2-Benzenedicarboxylic acid, bis(2-methylpropyl) ester | ≥85% | 38,859,643  | 0.6 | 14.5  | 78.0  | 159.2   | 0.1 | 0.2 |
| 146 | 35.6 | 6 |                                                         | <85% | 351,028,018 | 5.6 | 130.9 | 704.7 | 1,438.0 | 0.7 | 1.4 |
| 147 | 35.7 | 6 |                                                         | <85% | 2,890,974   | 0.0 | 1.1   | 5.8   | 11.8    | 0.0 | 0.0 |
| 148 | 35.8 | 6 |                                                         | <85% | 9,802,298   | 0.2 | 3.7   | 19.7  | 40.2    | 0.0 | 0.0 |
| 149 | 35.9 | 6 |                                                         | <85% | 14,506,983  | 0.2 | 5.4   | 29.1  | 59.4    | 0.0 | 0.1 |
| 150 | 36.0 | 6 |                                                         | <85% | 7,147,318   | 0.1 | 2.7   | 14.3  | 29.3    | 0.0 | 0.0 |
| 151 | 36.0 | 6 |                                                         | <85% | 10,94,614   | 0.0 | 0.4   | 2.2   | 4.5     | 0.0 | 0.0 |
| 152 | 36.2 | 6 |                                                         | <85% | 3,988,749   | 0.1 | 1.5   | 8.0   | 16.3    | 0.0 | 0.0 |
| 153 | 36.3 | 6 |                                                         | <85% | 12,341,542  | 0.2 | 4.6   | 24.8  | 50.6    | 0.0 | 0.1 |
| 154 | 36.6 | 6 |                                                         | <85% | 14,906,620  | 0.2 | 5.6   | 29.9  | 61.1    | 0.0 | 0.1 |
| 155 | 36.9 | 6 |                                                         | <85% | 4,565,760   | 0.1 | 1.7   | 9.2   | 18.7    | 0.0 | 0.0 |
| 156 | 37.0 | 6 |                                                         | <85% | 11,766,921  | 0.2 | 4.4   | 23.6  | 48.2    | 0.0 | 0.0 |
| 157 | 37.3 | 6 |                                                         | <85% | 9,445,869   | 0.2 | 3.5   | 19.0  | 38.7    | 0.0 | 0.0 |
| 158 | 37.4 | 6 |                                                         | <85% | 2,689,988   | 0.0 | 1.0   | 5.4   | 11.0    | 0.0 | 0.0 |
| 159 | 37.6 | 6 |                                                         | <85% | 5,128,795   | 0.1 | 1.9   | 10.3  | 21.0    | 0.0 | 0.0 |
| 160 | 37.7 | 6 |                                                         | <85% | 19,246,116  | 0.3 | 7.2   | 38.6  | 78.8    | 0.0 | 0.1 |
| 161 | 37.9 | 6 |                                                         | <85% | 9,773,157   | 0.2 | 3.6   | 19.6  | 40.0    | 0.0 | 0.0 |

|     |      |   |                                          |      |             |     |      |       |       |     |     |
|-----|------|---|------------------------------------------|------|-------------|-----|------|-------|-------|-----|-----|
| 162 | 37.9 | 6 |                                          | <85% | 2,739,317   | 0.0 | 1.0  | 5.5   | 11.2  | 0.0 | 0.0 |
| 163 | 38.2 | 6 |                                          | <85% | 2,359,703   | 0.0 | 0.9  | 4.7   | 9.7   | 0.0 | 0.0 |
| 164 | 38.3 | 6 |                                          | <85% | 4,666,761   | 0.1 | 1.7  | 9.4   | 19.1  | 0.0 | 0.0 |
| 165 | 38.6 | 6 |                                          | <85% | 13,970,650  | 0.2 | 5.2  | 28.0  | 57.2  | 0.0 | 0.1 |
| 166 | 38.8 | 6 |                                          | <85% | 5,615,347   | 0.1 | 2.1  | 11.3  | 23.0  | 0.0 | 0.0 |
| 167 | 39.1 | 6 |                                          | <85% | 1,564,060   | 0.0 | 0.6  | 3.1   | 6.4   | 0.0 | 0.0 |
| 168 | 39.2 | 6 |                                          | <85% | 13,759,814  | 0.2 | 5.1  | 27.6  | 56.4  | 0.0 | 0.1 |
| 169 | 39.5 | 6 |                                          | <85% | 8,091,295   | 0.1 | 3.0  | 16.2  | 33.1  | 0.0 | 0.0 |
| 170 | 39.8 | 6 |                                          | <85% | 12,002,218  | 0.2 | 4.5  | 24.1  | 49.2  | 0.0 | 0.0 |
| 171 | 40.1 | 6 |                                          | <85% | 140,395,945 | 2.3 | 52.4 | 281.9 | 575.1 | 0.3 | 0.6 |
| 172 | 40.4 | 6 |                                          | <85% | 7,229,902   | 0.1 | 2.7  | 14.5  | 29.6  | 0.0 | 0.0 |
| 173 | 40.8 | 6 |                                          | <85% | 4,245,318   | 0.1 | 1.6  | 8.5   | 17.4  | 0.0 | 0.0 |
| 174 | 41.0 | 6 |                                          | <85% | 8,024,927   | 0.1 | 3.0  | 16.1  | 32.9  | 0.0 | 0.0 |
| 175 | 41.3 | 6 |                                          | <85% | 4,205,260   | 0.1 | 1.6  | 8.4   | 17.2  | 0.0 | 0.0 |
| 176 | 41.5 | 6 |                                          | <85% | 6,712,515   | 0.1 | 2.5  | 13.5  | 27.5  | 0.0 | 0.0 |
| 177 | 41.8 | 6 | Phthalimide                              | ≥85% | 9,309,945   | 0.1 | 3.5  | 18.7  | 38.1  | 0.0 | 0.0 |
| 178 | 42.2 | 6 |                                          | <85% | 4,425,038   | 0.1 | 1.7  | 8.9   | 18.1  | 0.0 | 0.0 |
| 179 | 42.4 | 6 | 1,2,4,8-Tetramethylbicyclo[6.3.0]undeca- | ≥85% | 53,259,887  | 0.9 | 19.9 | 106.9 | 218.2 | 0.1 | 0.2 |

|                                                        |      |   |                                    |      |             |     |      |                 |                 |             |             |
|--------------------------------------------------------|------|---|------------------------------------|------|-------------|-----|------|-----------------|-----------------|-------------|-------------|
|                                                        |      |   | 2,4-diene                          |      |             |     |      |                 |                 |             |             |
| 180                                                    | 42.9 | 6 |                                    | <85% | 13,507,550  | 0.2 | 5.0  | 27.1            | 55.3            | 0.0         | 0.1         |
| 181                                                    | 43.3 | 6 |                                    | <85% | 8,522,977   | 0.1 | 3.2  | 17.1            | 34.9            | 0.0         | 0.0         |
| 182                                                    | 45.3 | 6 | 1,1':4',1''-Terphenyl-, 3'-methyl- | ≥85% | 8,403,449   | 0.1 | 3.1  | 16.9            | 34.4            | 0.0         | 0.0         |
| 183                                                    | 45.6 | 6 |                                    | <85% | 136,057,790 | 2.2 | 50.7 | 273.2           | 557.4           | 0.3         | 0.6         |
| 184                                                    | 46.1 | 6 |                                    | <85% | 32,015,699  | 0.5 | 11.9 | 64.3            | 131.2           | 0.1         | 0.1         |
| <b>Total</b>                                           |      |   |                                    |      |             |     |      | <b>38,012.7</b> | <b>41,604.0</b> | <b>37.9</b> | <b>41.5</b> |
| Identified signals                                     |      |   |                                    |      |             |     |      | 32,087.6        | 33,208.3        | 32.0        | 33.0        |
| Unknown signals                                        |      |   |                                    |      |             |     |      | 5,925.1         | 8,395.7         | 5.9         | 8.5         |
| Unknown % = 100*Unknown signals/Total detected signals |      |   |                                    |      |             |     |      | 15.6            | 20.2            | 15.6        | 20.5        |

Table S17. "WEEE (1/10)" (ID6 diluted) pyrolysis liquid composition details, where the following information is given for each detected signal: (a) number of signal, (b) retention time, (c) window, (d) compound name, (e) quality match (below or equal and above 85 %), (f) integrated area, (g) area percentage, (h) normalised area to the internal standard, (i) calculated concentration in µg/mL (calculated as normalised area of the compound multiplied by the correction factor and by the response factor (RF)), (j) calculated concentration in µg/mL (calculated as normalised area of the compound without multiplying by the correction factor and multiplying it by the response factor (RF)), (k) concentration (using correction factor) in wt.%. and (l) concentration (without using the correction factor) in wt.%.

| (a) | (b)         | (c) | (d)             | (e)              | (f)        | (g)    | (h)           | (i)                    | (j)                   | (k)                  | (l)                 |
|-----|-------------|-----|-----------------|------------------|------------|--------|---------------|------------------------|-----------------------|----------------------|---------------------|
| N°  | RT<br>(min) | W   | Compound        | Quality<br>match | Area       | Area % | Norm.<br>Area | [ ] with CF<br>(µg/mL) | [ ] w/o CF<br>(µg/mL) | [ ] with CF<br>(wt%) | [ ] w/o CF<br>(wt%) |
| 1   | 3.5         | 1   |                 | <85%             | 6,380,974  | 11.1   | 3.7           | 194.3                  | 158.4                 | 19.1                 | 15.5                |
| 2   | 3.6         | 1   |                 | <85%             | 1,879,263  | 3.3    | 1.1           | 57.2                   | 46.7                  | 5.6                  | 4.6                 |
|     | 8.1         |     | 1-Propanol (IS) | ≥85%             | 2,124,042  |        |               |                        |                       |                      |                     |
| 3   | 8.1         | 2   | Toluene         | ≥85%             | 2,124,042  | 3.7    | 1.2           | 35.6                   | 43.3                  | 3.5                  | 4.2                 |
| 4   | 10.1        | 2   |                 | <85%             | 10,167,987 | 17.7   | 5.8           | 170.5                  | 207.2                 | 16.7                 | 20.3                |
| 5   | 11.2        | 3   |                 | <85%             | 1,320,063  | 2.3    | 0.8           | 21.1                   | 17.5                  | 2.1                  | 1.7                 |
| 6   | 13.2        | 3   | Styrene         | ≥85%             | 17,918,160 | 31.3   | 10.3          | 286.9                  | 238.0                 | 28.1                 | 23.3                |
| 7   | 20.4        | 3   |                 | <85%             | 7,713,408  | 13.5   | 4.4           | 123.5                  | 102.5                 | 12.1                 | 10.0                |

|                                                        |      |   |        |      |           |      |     |              |              |      |      |
|--------------------------------------------------------|------|---|--------|------|-----------|------|-----|--------------|--------------|------|------|
| 8                                                      | 28.0 | 4 | Phenol | ≥85% | 7,657,400 | 13.4 | 4.4 | 96.7         | 86.2         | 9.5  | 8.4  |
| 9                                                      | 31.7 | 5 |        | <85% | 2,169,218 | 3.8  | 1.2 | 10.4         | 17.7         | 1.0  | 1.7  |
| <b>Total</b>                                           |      |   |        |      |           |      |     | <b>996.4</b> | <b>917.5</b> | 97.7 | 89.9 |
| Identified signals                                     |      |   |        |      |           |      |     | 419.2        | 367.5        | 41.1 | 35.9 |
| Unknown signals                                        |      |   |        |      |           |      |     | 577.2        | 550          | 56.6 | 54   |
| Unknown % = 100*Unknown signals/Total detected signals |      |   |        |      |           |      |     | 57.9         | 59.9         | 57.9 | 60.1 |



Table S18. (a) Pyrolysis oil total concentration prepared experimentally, (b) total concentration calculated applying the proposed quantification methodology in  $\mu\text{g/mL}$  (using correction factor), (c) absolute and relative error and (d) number of identified signals in the GC/MS chromatograms. Total concentration quantified by methodology refers to the sum of the concentration of all the signals detected in the GC/MS chromatograph of the analysed pyrolysis oils by applying the proposed quantification methodology.

|            | (a)                                  | (b)                                                                       | (c)                                       |                       | (d)                                                                             | (e)                                       |                       | (f)                              |
|------------|--------------------------------------|---------------------------------------------------------------------------|-------------------------------------------|-----------------------|---------------------------------------------------------------------------------|-------------------------------------------|-----------------------|----------------------------------|
|            | Experimental<br>( $\mu\text{g/mL}$ ) | Proposed<br>quantification<br>methodology<br>with CF ( $\mu\text{g/mL}$ ) | Absolute<br>error<br>( $\mu\text{g/mL}$ ) | Relative<br>error (%) | Proposed<br>quantification<br>methodology<br>without CF<br>( $\mu\text{g/mL}$ ) | Absolute<br>error<br>( $\mu\text{g/mL}$ ) | Relative<br>error (%) | Number of<br>detected<br>signals |
| <b>ID1</b> | 9,820                                | 2,257                                                                     | -7,563                                    | -77                   | 2,516                                                                           | -7,304                                    | -74                   | 30                               |
| <b>ID2</b> | 10,150                               | 3,146                                                                     | -7,004                                    | -69                   | 3,372                                                                           | -6,778                                    | -67                   | 71                               |
| <b>ID3</b> | 11,190                               | 2,262                                                                     | -8,928                                    | -80                   | 2,374                                                                           | -8,816                                    | -79                   | 28                               |
| <b>ID4</b> | 10,890                               | 2,921                                                                     | -7,969                                    | -73                   | 3,392                                                                           | -7,498                                    | -69                   | 28                               |
| <b>ID5</b> | 10,580                               | 3,808                                                                     | -6,772                                    | -64                   | 4,030                                                                           | -6,550                                    | -62                   | 60                               |
| <b>ID6</b> | 10,270                               | 4,558                                                                     | -5,712                                    | -56                   | 4,604                                                                           | -5,666                                    | -55                   | 22                               |
| <b>ID7</b> | 10,700                               | 5,347                                                                     | -5,353                                    | -50                   | 5,238                                                                           | -5,462                                    | -51                   | 15                               |

|                         |         |        |         |     |        |         |     |     |
|-------------------------|---------|--------|---------|-----|--------|---------|-----|-----|
| <b>ID8</b>              | 10,050  | 5,584  | -4,466  | -44 | 5,561  | -4,489  | -45 | 19  |
| <b>ID9</b>              | 11,300  | 7,118  | -4,182  | -37 | 6,377  | -4,923  | -44 | 19  |
| <b>ID10</b>             | 10,870  | 6,723  | -4,147  | -38 | 6,559  | -4,311  | -40 | 21  |
| <b>ID11</b>             | 10,040  | 9,412  | -628    | -6  | 9,088  | -952    | -9  | 20  |
| <b>ID12</b>             | 35,440  | 12,019 | -23,421 | -66 | 11,508 | -23,932 | -68 | 98  |
| <b>ID1 concentrated</b> | 100,200 | 38,013 | -62,187 | -62 | 41,604 | -58,596 | -58 | 184 |
| <b>ID6 diluted</b>      | 1,020   | 996    | -24     | -2  | 917    | -103    | -10 | 9   |

Table S19. Total concentration of the validation compounds quantification ( $\mu\text{g/mL}$ ) in the analysed pyrolysis oils based on (a) calibration, (b) based on the proposed methodology (with correction factor), (c) absolute and relative error, (d) based on the proposed methodology (without correction factor) and (e) absolute and relative error.

|            | (a)                                                  | (b)                                                              | (c)                                 |                    | (d)                                                                 | (e)                                 |                    |
|------------|------------------------------------------------------|------------------------------------------------------------------|-------------------------------------|--------------------|---------------------------------------------------------------------|-------------------------------------|--------------------|
|            | Calibration based concentration ( $\mu\text{g/mL}$ ) | Proposed quantification methodology with CF ( $\mu\text{g/mL}$ ) | Absolute error ( $\mu\text{g/mL}$ ) | Relative error (%) | Proposed quantification methodology without CF ( $\mu\text{g/mL}$ ) | Absolute error ( $\mu\text{g/mL}$ ) | Relative error (%) |
| <b>ID1</b> | 673                                                  | 1,042                                                            | +369                                | +55                | 1,015                                                               | +342                                | +51                |
| <b>ID2</b> | 1,788                                                | 1,504                                                            | -284                                | -16                | 1,342                                                               | -446                                | -25                |
| <b>ID3</b> | 887                                                  | 1,288                                                            | +400                                | +45                | 1,253                                                               | -769                                | -87                |
| <b>ID4</b> | 1,772                                                | 1,404                                                            | -368                                | -21                | 1,253                                                               | -519                                | -29                |
| <b>ID5</b> | 1,552                                                | 2,354                                                            | +802                                | +52                | 2,271                                                               | +719                                | +46                |
| <b>ID6</b> | 3,820                                                | 2,997                                                            | +1,087                              | +57                | 2,788                                                               | +878                                | +46                |
| <b>ID7</b> | 3,212                                                | 4,352                                                            | +1,140                              | +35                | 4,188                                                               | +976                                | +30                |
| <b>ID8</b> | 3,178                                                | 4,425                                                            | +1,248                              | +39                | 4,374                                                               | +1,196                              | +38                |
| <b>ID9</b> | 4,202                                                | 5,797                                                            | +1,595                              | +38                | 5,514                                                               | +1,312                              | +31                |

|                         |        |        |        |     |        |        |     |
|-------------------------|--------|--------|--------|-----|--------|--------|-----|
| <b>ID10</b>             | 4,034  | 5,412  | +1,377 | +34 | 5,165  | +1,130 | +28 |
| <b>ID11</b>             | 5,345  | 7,567  | +2,222 | +42 | 7,376  | +2,030 | +38 |
| <b>ID12</b>             | 4,323  | 6,420  | +2,097 | +49 | 5,827  | +1,504 | +35 |
| <b>ID1 concentrated</b> | 12,404 | 19,426 | +7,022 | +57 | 18,023 | +5,618 | +45 |
| <b>ID6 diluted</b>      | 324    | 419    | +95    | +29 | 367    | +43    | +13 |

Table S20. Non isothermal Kováts retention index (KRI) of all the identified compounds (match quality  $\geq 85\%$  in the MS library search) for all the studied pyrolysis liquids (including those in the Supplementary Material identified with their corresponding ID listed in Table S1).

| Heating segment | Equation factor |             | RT (min) | Compound                         | KRI   | Liquid ID |
|-----------------|-----------------|-------------|----------|----------------------------------|-------|-----------|
|                 | Slope           | Indep. term |          |                                  |       |           |
| 40              | 255,48          | -301,39     | 3.64     | Hexane                           | 628.6 | ID12      |
|                 |                 |             | 3.71     | 1-Hexene                         | 646.4 | ID12      |
|                 |                 |             | 3.91     | Heptane                          | 697.5 | ID12      |
|                 |                 |             | 4.00     | 3-Penten-1-yne, (E)-             | 720.5 | ID5       |
|                 |                 |             | 4.11     | 1-Heptene                        | 748.6 | ID12      |
|                 |                 |             | 4.27     | Propanal                         | 789.5 | ID1       |
| 40-150          | 57,844          | 469,36      | 6.07     | Benzene                          | 820.5 | ID1       |
|                 |                 |             | 6.07     | Benzene                          | 820.5 | ID6       |
|                 |                 |             | 6.08     | Benzene                          | 821.1 | ID5       |
|                 |                 |             | 7.16     | 2-Propenenitrile                 | 883.5 | ID10      |
|                 |                 |             | 7.16     | 2-Propenenitrile                 | 883.5 | ID11      |
|                 |                 |             | 7.17     | 2-Propenenitrile                 | 884.1 | ID7       |
|                 |                 |             | 7.17     | 2-Propenenitrile                 | 884.1 | ID8       |
|                 |                 |             | 7.17     | 2-Propenenitrile                 | 884.1 | ID9       |
|                 |                 |             | 7.72     | 1,3-Dioxolane, 2-ethyl-4-methyl- | 915.9 | ID1       |
|                 |                 |             | 8.02     | 1-Propanol                       | 933.3 | ID12      |
|                 |                 |             | 8.13     | 1-Propanol                       | 939.6 | ID7       |
|                 |                 |             | 8.13     | 1-Propanol                       | 939.6 | ID8       |
|                 |                 |             | 8.13     | 1-Propanol                       | 939.6 | ID9       |
|                 |                 |             | 8.14     | 1-Propanol                       | 940.2 | ID10      |
|                 |                 |             | 8.15     | 1-Propanol                       | 940.8 | ID11      |
|                 |                 |             | 8.15     | 1-Propanol                       | 940.8 | ID1       |
|                 |                 |             | 8.15     | 1-Propanol                       | 940.8 | ID3       |
|                 |                 |             | 8.16     | 1-Propanol                       | 941.4 | ID4       |
|                 |                 |             | 8.16     | 1-Propanol                       | 941.4 | ID6       |
|                 |                 |             | 8.17     | 1-Propanol                       | 941.9 | ID2       |
|                 |                 |             | 8.17     | 1-Propanol                       | 941.9 | ID5       |
|                 |                 |             | 8.13     | Toluene                          | 939.6 | ID7       |
|                 |                 |             | 8.13     | Toluene                          | 939.6 | ID8       |
|                 |                 |             | 8.13     | Toluene                          | 939.6 | ID9       |
|                 |                 |             | 8.14     | Toluene                          | 940.2 | ID10      |
|                 |                 |             | 8.14     | Toluene                          | 940.2 | ID11      |
| 8.15            | Toluene         | 940.8       | ID1      |                                  |       |           |
| 8.15            | Toluene         | 940.8       | ID3      |                                  |       |           |
| 8.15            | Toluene         | 940.8       | ID5      |                                  |       |           |
| 8.15            | Toluene         | 940.8       | ID2      |                                  |       |           |

|  |  |       |                           |        |      |
|--|--|-------|---------------------------|--------|------|
|  |  | 8.16  | Toluene                   | 941.4  | ID4  |
|  |  | 8.26  | Toluene                   | 947.2  | ID12 |
|  |  | 8.25  | 1-Octene                  | 946.6  | ID12 |
|  |  | 8.52  | Water                     | 962.2  | ID10 |
|  |  | 8.52  | Water                     | 962.2  | ID11 |
|  |  | 8.54  | Water                     | 963.3  | ID5  |
|  |  | 8.55  | Water                     | 963.9  | ID7  |
|  |  | 8.55  | Water                     | 963.9  | ID8  |
|  |  | 8.55  | Water                     | 963.9  | ID9  |
|  |  | 8.63  | Water                     | 968.6  | ID12 |
|  |  | 9.35  | Cyclooctene               | 1010.2 | ID12 |
|  |  | 10.16 | Ethylbenzene              | 1057.1 | ID12 |
|  |  | 10.16 | Ethylbenzene              | 1057.1 | ID10 |
|  |  | 10.16 | Ethylbenzene              | 1057.1 | ID11 |
|  |  | 10.17 | Ethylbenzene              | 1057.6 | ID7  |
|  |  | 10.17 | Ethylbenzene              | 1057.6 | ID8  |
|  |  | 10.17 | Ethylbenzene              | 1057.6 | ID9  |
|  |  | 10.18 | Ethylbenzene              | 1058.2 | ID1  |
|  |  | 10.19 | Ethylbenzene              | 1058.8 | ID5  |
|  |  | 10.19 | Ethylbenzene              | 1058.8 | ID3  |
|  |  | 10.19 | Ethylbenzene              | 1058.8 | ID6  |
|  |  | 11.26 | Benzene, (1-methylethyl)  | 1120.7 | ID10 |
|  |  | 11.26 | Benzene, (1-methylethyl)  | 1120.7 | ID11 |
|  |  | 11.26 | Benzene, (1-methylethyl)  | 1120.7 | ID7  |
|  |  | 11.26 | Benzene, (1-methylethyl)  | 1120.7 | ID8  |
|  |  | 11.26 | Benzene, (1-methylethyl)  | 1120.7 | ID9  |
|  |  | 11.28 | Benzene, (1-methylethyl)- | 1121.8 | ID1  |
|  |  | 11.28 | Benzene, (1-methylethyl)- | 1121.8 | ID5  |
|  |  | 11.29 | Benzene, (1-methylethyl)- | 1122.4 | ID6  |
|  |  | 12.06 | Benzene, propyl           | 1167.0 | ID10 |
|  |  | 12.06 | Benzene, propyl           | 1167.0 | ID11 |
|  |  | 12.08 | Benzene, propyl           | 1168.1 | ID7  |
|  |  | 12.08 | Benzene, propyl           | 1168.1 | ID8  |
|  |  | 12.08 | Benzene, propyl           | 1168.1 | ID9  |
|  |  | 13.16 | Styrene                   | 1230.6 | ID10 |
|  |  | 13.16 | Styrene                   | 1230.6 | ID11 |
|  |  | 13.18 | Styrene                   | 1231.7 | ID7  |
|  |  | 13.18 | Styrene                   | 1231.7 | ID8  |
|  |  | 13.18 | Styrene                   | 1231.7 | ID9  |
|  |  | 13.20 | Styrene                   | 1232.9 | ID5  |
|  |  | 13.20 | Styrene                   | 1232.9 | ID1  |
|  |  | 13.22 | Styrene                   | 1234.1 | ID2  |
|  |  | 13.23 | Styrene                   | 1234.6 | ID3  |
|  |  | 13.23 | Styrene                   | 1234.6 | ID6  |

|         |        |        |       |                                                     |        |      |
|---------|--------|--------|-------|-----------------------------------------------------|--------|------|
|         |        |        | 13.43 | Benzene,<br>1-methyl-2-(1-methylethyl)-             | 1246.2 | ID2  |
|         |        |        | 13.50 | Styrene                                             | 1250.3 | ID12 |
|         |        |        | 14.69 | alpha-Methylstyrene                                 | 1319.1 | ID10 |
|         |        |        | 14.69 | alpha-Methylstyrene                                 | 1319.1 | ID11 |
|         |        |        | 14.72 | alpha-Methylstyrene                                 | 1320.8 | ID5  |
|         |        |        | 14.72 | alpha-Methylstyrene                                 | 1320.8 | ID7  |
|         |        |        | 14.72 | alpha-Methylstyrene                                 | 1320.8 | ID8  |
|         |        |        | 14.72 | alpha-Methylstyrene                                 | 1320.8 | ID9  |
|         |        |        | 14.98 | alpha-Methylstyrene                                 | 1335.9 | ID12 |
|         |        |        | 15.15 | Benzene,<br>2,4-diethyl-1-methyl-                   | 1345.7 | ID2  |
|         |        |        | 15.82 | 1-Undecene                                          | 1384.5 | ID12 |
|         |        |        | 17.27 | 5-Dodecene, (E )-                                   | 1468.3 | ID12 |
| 150     | 50,621 | 619,62 | 22.12 | 1H-Inden-1-one,<br>2,3-dihydro-3,3-dimethyl-        | 1739.4 | ID2  |
|         |        |        | 22.56 | Pyridine, 2-methyl-                                 | 1761.6 | ID3  |
| 150-240 | 60,876 | 307,65 | 24.31 | Naphthalene,<br>1,2,3,4-tetrahydro-1,1,6-trimethyl- | 1787.5 | ID2  |
|         |        |        | 24.65 | 5-Octadecene,(E )-                                  | 1808.2 | ID12 |
|         |        |        | 25.76 | Naphthalene, 1-methyl                               | 1875.8 | ID10 |
|         |        |        | 25.76 | Naphthalene, 1-methyl                               | 1875.8 | ID11 |
|         |        |        | 25.85 | Nonadecane                                          | 1881.3 | ID12 |
|         |        |        | 25.93 | Pheno, 2,6-Dimethyl                                 | 1886.2 | ID10 |
|         |        |        | 25.93 | Pheno, 2,6-Dimethyl                                 | 1886.2 | ID11 |
|         |        |        | 26.00 | Pheno, 2,6-Dimethyl                                 | 1890.4 | ID8  |
|         |        |        | 26.00 | Pheno, 2,6-Dimethyl                                 | 1890.4 | ID9  |
|         |        |        | 25.95 | Phenol, 3,5-dimethyl-                               | 1887.4 | ID2  |
|         |        |        | 26.94 | 1-Nonadecene                                        | 1947.6 | ID12 |
|         |        |        | 27.86 | Eicosane                                            | 2003.7 | ID12 |
|         |        |        | 27.92 | Phenol                                              | 2007.3 | ID10 |
|         |        |        | 27.92 | Phenol                                              | 2007.3 | ID11 |
|         |        |        | 27.95 | Phenol                                              | 2009.1 | ID2  |
|         |        |        | 27.98 | Phenol                                              | 2011.0 | ID4  |
|         |        |        | 27.99 | Phenol                                              | 2011.6 | ID7  |
|         |        |        | 27.99 | Phenol                                              | 2011.6 | ID8  |
|         |        |        | 27.99 | Phenol                                              | 2011.6 | ID9  |
|         |        |        | 28.02 | Phenol                                              | 2013.4 | ID5  |
|         |        |        | 28.06 | Phenol                                              | 2015.8 | ID3  |
|         |        |        | 28.91 | Cycloeicosane                                       | 2067.6 | ID12 |
|         |        |        | 29.13 | Phenol, 2-ethyl-                                    | 2081.0 | ID2  |
|         |        |        | 29.16 | Phenol, 2-ethyl-                                    | 2082.8 | ID4  |
|         |        |        | 29.37 | Phenol, 3-ethyl                                     | 2095.6 | ID10 |
|         |        |        | 29.37 | Phenol, 2,3-dimethyl-                               | 2095.6 | ID11 |

|       |                                          |        |      |
|-------|------------------------------------------|--------|------|
| 29.37 | Phenol, 4-methyl-                        | 2095.6 | ID2  |
| 29.42 | Phenol, 4-methyl-                        | 2098.6 | ID4  |
| 29.45 | Phenol, 3-ethyl                          | 2100.4 | ID7  |
| 29.45 | Phenol, 3-ethyl                          | 2100.4 | ID8  |
| 29.45 | Phenol, 3-ethyl                          | 2100.4 | ID9  |
| 29.72 | Heneicosane                              | 2116.9 | ID12 |
| 30.09 | Benzenebutanenitrile                     | 2139.4 | ID10 |
| 30.09 | Benzenebutanenitrile                     | 2139.4 | ID11 |
| 30.23 | Benzenebutanenitrile                     | 2147.9 | ID7  |
| 30.23 | Benzenebutanenitrile                     | 2147.9 | ID8  |
| 30.23 | Benzenebutanenitrile                     | 2147.9 | ID9  |
| 30.54 | 10-Heneicosene (c,t)                     | 2166.8 | ID12 |
| 30.90 | Phenol, 2-ethyl-                         | 2188.7 | ID2  |
| 30.93 | Phenol, 4-ethyl-                         | 2190.5 | ID4  |
| 30.94 | Phenol, 3-ethyl                          | 2191.2 | ID11 |
| 31.25 | Phenol,<br>2-methyl-5-(1-methylethyl)-   | 2210.0 | ID2  |
| 31.25 | Docosane                                 | 2210.0 | ID12 |
| 31.26 | Phenol,<br>2-methyl-5-(1-methylethyl)-   | 2210.6 | ID4  |
| 31.50 | Phenol, 4-(1-methylethyl)                | 2225.2 | ID10 |
| 31.50 | Phenol, 4-(1-methylethyl)                | 2225.2 | ID11 |
| 31.54 | Phenol, 4-(1-methylethyl)-               | 2227.7 | ID2  |
| 31.57 | Phenol, 4-(1-methylethyl)-               | 2229.5 | ID4  |
| 31.58 | Phenol, 4-(1-methylethyl)                | 2230.1 | ID7  |
| 31.58 | Phenol, 4-(1-methylethyl)                | 2230.1 | ID8  |
| 31.58 | Phenol, 4-(1-methylethyl)                | 2230.1 | ID9  |
| 31.58 | Phenol, 3-(1-methylethyl)-               | 2230.1 | ID5  |
| 31.82 | Benzene, 1,1'-(1,3-propanediyl)bis-      | 2244.7 | ID12 |
| 31.97 | 1-Docosene                               | 2253.9 | ID12 |
| 32.13 | Benzene,<br>1,1'-(1,3-propanediyl)bis-   | 2263.6 | ID5  |
| 32.23 | Benzene,<br>1,1'-(1,3-propanediyl)bis-   | 2269.7 | ID1  |
| 32.24 | Benzene,<br>1,1'-(1,3-propanediyl)bis-   | 2270.3 | ID3  |
| 32.47 | Phenol, p-tert-butyl                     | 2284.3 | ID10 |
| 32.47 | Phenol, p-tert-butyl                     | 2284.3 | ID11 |
| 32.50 | Benzene,<br>1,1'-(1,3-propanediyl)bis-   | 2286.1 | ID6  |
| 32.52 | Phenol, p-tert-butyl-                    | 2287.3 | ID4  |
| 32.74 | Tricosane                                | 2300.7 | ID12 |
| 32.80 | Dimethyl phthalate                       | 2304.4 | ID5  |
| 32.91 | 1H-Isoindole-1,3(2H)-dione,<br>2-methyl- | 2311.1 | ID3  |



|     |        |        |       |                                                |        |      |
|-----|--------|--------|-------|------------------------------------------------|--------|------|
|     |        |        | 33.27 | 9-Tricosene, (Z)-                              | 2333.0 | ID12 |
|     |        |        | 33.67 | Benzoic acid                                   | 2357.3 | ID5  |
|     |        |        | 33.96 | Tetracosane                                    | 2375.0 | ID12 |
|     |        |        | 34.34 | Naphthalene,<br>1,2,3,4, tetrahydro-1-phneyl   | 2398.1 | ID10 |
|     |        |        | 34.50 | Benzene,<br>1,1'-cyclopropylidenebis-          | 2407.9 | ID5  |
|     |        |        | 34.55 | Cyclotetracosane                               | 2410.9 | ID12 |
|     |        |        | 34.56 | Benzoic acid                                   | 2411.5 | ID1  |
|     |        |        | 34.71 | Isopropenylphenol                              | 2420.7 | ID11 |
|     |        |        | 34.72 | Benzoic acid                                   | 2421.3 | ID6  |
|     |        |        | 34.72 | p-Isopropenylphenol                            | 2421.3 | ID8  |
|     |        |        | 34.74 | p-Isopropenylphenol                            | 2422.5 | ID4  |
| 240 | 61,149 | 374,24 | 35.08 | Bicyclo[4.2.1]nona-<br>2,4,7-triene, 7-phenyl- | 2519.3 | ID1  |
|     |        |        | 35.18 | Pentacosane                                    | 2525.5 | ID12 |
|     |        |        | 35.79 | z-12-Pentacosene                               | 2562.8 | ID12 |
|     |        |        | 36.87 | Benzenamine, 2,5-dichloro-                     | 2628.8 | ID2  |
|     |        |        | 37.13 | 9-Hexacosene                                   | 2644.7 | ID12 |
|     |        |        | 37.57 | Heptacosane                                    | 2671.6 | ID12 |
|     |        |        | 39.03 | Octacosane                                     | 2760.9 | ID12 |
|     |        |        | 39.99 | Cyclooctacosane                                | 2819.6 | ID12 |
|     |        |        | 40.80 | Nonacosane                                     | 2869.1 | ID12 |
|     |        |        | 41.87 | Z-14-Nonacosane                                | 2934.5 | ID12 |
|     |        |        | 44.21 | Cyclotriacontane                               | 3077.6 | ID12 |
|     |        |        | 45.37 | Triacontane                                    | 3148.6 | ID12 |
